# Supplementary material
Source: PubMed Central journal article supplement (PMC3089770)
Supplement: NIHMS272912-supplement-Supp1.pdf [file NIHMS272912-supplement-Supp1.pdf]

Manuscript Number: CIRCULATIONAHA/2008/843854

## **DATA SUPPLEMENT**

**Binding Sites for Ets Family of Transcription Factors Dominate the Promoter Regions of Differentially Expressed Genes in Abdominal Aortic Aneurysms**

Jennifer Nischan, MS; Zoran Gatalica, MD, DSc; Mindee Curtis, BS; Guy M. Lenk, PhD; Gerard Tromp, PhD, FAHA; and Helena Kuivaniemi, MD, PhD, FAHA

From the Center for Molecular Medicine and Genetics (J.N., G.M.L., G.T., H.K.), and Departments of Neurology (G.T.) and Surgery (H.K.), Wayne State University School of Medicine, Detroit, MI; and Department of Pathology, Creighton University School of Medicine, Omaha, NE (Z.G., M.C.)

**Table S1. Tissue Samples Used in Immunohistochemical Analyses**

| Sample Code | Sample Origin  | Sample Type | Donor Sex | Donor Age (years) | Diagnosis |
|-------------|----------------|-------------|-----------|-------------------|-----------|
| WSU037      | Aneurysmal sac | Operation   | Male      | 79                | AAA       |
| WSU038      | Aneurysmal sac | Operation   | Male      | 67                | AAA       |
| WSU039      | Aneurysmal sac | Operation   | Male      | 64                | AAA       |
| WSU048      | Aneurysmal sac | Operation   | Female    | 87                | AAA       |
| WSU050      | Aneurysmal sac | Operation   | NA*       | 87                | AAA       |
| WSU064      | Aneurysmal sac | Operation   | Male      | 63                | AAA       |
| A07-83      | Aortic wall    | Autopsy     | Female    | 87                |           |
| A07-84      | Aortic wall    | Autopsy     | Male      | 58                |           |
| A07-87      | Aortic wall    | Autopsy     | Male      | 62                |           |
| A07-88      | Aortic wall    | Autopsy     | Female    | 58                |           |
| A07-90      | Aortic wall    | Autopsy     | Male      | 68                |           |

Control aorta samples were obtained at autopsy. Patient samples were tissues removed from the aneurysmal sac during surgical repair operations to trim the area for fitting the prosthesis.

\*Not available

**Table S2. 144 Overrepresented TFBSs in Promoters of Genes Downregulated in AAA**

| TFBS*                       | Hits in Gene Set | Hits on Genome | $-\log_{10} P$ | TF Class              | TransFac Class ID |
|-----------------------------|------------------|----------------|----------------|-----------------------|-------------------|
| SOX5                        | 3923             | 44277          | 91.5           | HMG                   | C0015             |
| LEF1/TCF1                   | 3771             | 42880          | 84.3           | HMG                   | C0015             |
| FOXO1                       | 3811             | 43570          | 82.5           | fork head             | C0023             |
| POU1F1                      | 3523             | 40305          | 76.1           | POU                   | C0007             |
| FOXP3                       | 3630             | 42427          | 68.7           | fork head             | C0023             |
| FOXO4                       | 2992             | 34073          | 66.6           | fork head             | C0023             |
| TFIIA <sup>‡</sup>          | 3547             | 41523          | 66.5           |                       |                   |
| RFX1                        | 4087             | 48905          | 66.1           | fork head             | C0023             |
| AP4                         | 3565             | 41839          | 65.8           | bHLH-ZIP              | C0012             |
| HNF4ALPHA                   | 3899             | 46399          | 65.5           | CC (rec)              | C0002             |
| POU6F1                      | 3327             | 38731          | 64.7           | POU                   | C0007             |
| PITX2                       | 4030             | 48560          | 62.1           | homeo                 | C0006             |
| RBPJK <sup>‡</sup>          | 4050             | 49039          | 60.2           |                       |                   |
| E2F1/DP2 <sup>‡</sup>       | 2972             | 34433          | 59.7           |                       |                   |
| BARBIE <sup>‡</sup>         | 3092             | 36071          | 59.5           |                       |                   |
| GATA3                       | 3393             | 40302          | 57.9           | CC (g)                | C0003             |
| IRF1                        | 2522             | 28928          | 54.0           | trp                   | C0022             |
| TEF                         | 2573             | 29679          | 53.3           | bZIP                  | C0008             |
| E2F1/DP1                    | 3189             | 38173          | 51.7           | fork head             | C0023             |
| SOX9                        | 2349             | 27130          | 48.4           | HMG                   | C0015             |
| CART1                       | 2092             | 23736          | 48.0           | homeo                 | C0006             |
| DR3                         | 3318             | 40723          | 44.9           | CC (rec)              | C0002             |
| STAF                        | 2308             | 27302          | 40.9           | CH                    | C0001             |
| CEBP                        | 1680             | 18937          | 40.2           | bZIP                  | C0008             |
| GATA                        | 1791             | 20534          | 38.8           | CC (g)                | C0003             |
| S8                          | 1482             | 16494          | 38.2           | homeo                 | C0006             |
| LHX3                        | 1849             | 21421          | 37.6           | LIM-homeo             | C0025             |
| AMEF2                       | 1793             | 20711          | 37.2           | MADS                  | C0014             |
| HP1/SITEFACTOR <sup>‡</sup> | 1566             | 17707          | 36.9           |                       |                   |
| IK1                         | 1938             | 22989          | 33.9           | CH                    | C0001             |
| MINI20 <sup>‡</sup>         | 3053             | 38710          | 31.8           |                       |                   |
| GATA2                       | 1521             | 17575          | 31.7           | CC (g)                | C0003             |
| NKX61                       | 960              | 10209          | 31.5           | NK-2/Nkx              | C0053             |
| VBP                         | 1464             | 16840          | 31.4           | bZIP                  | C0008             |
| LBP1                        | 1687             | 19854          | 31.2           | Grainyhead            | C0051             |
| HFH8                        | 1389             | 15852          | 31.2           | fork head             | C0023             |
| TITF1                       | 1705             | 20286          | 29.4           | NK-2/Nkx <sup>†</sup> | C0053             |
|                             |                  |                |                | homeo <sup>†</sup>    | C0006             |
| TEF1                        | 1125             | 12520          | 29.3           | TEA                   | C0024             |
| ERR1                        | 3309             | 42698          | 29.3           | CC (rec)              | C0002             |
| MEIS1                       | 2219             | 27385          | 29.2           | homeo                 | C0006             |
| TFIII <sup>‡</sup>          | 1992             | 24258          | 29.0           |                       |                   |
| CMYB                        | 2113             | 25955          | 28.8           | trp                   | C0022             |
| GLI                         | 3401             | 44154          | 28.3           | CH                    | C0001             |
| AR                          | 1561             | 18467          | 28.0           | CC (rec)              | C0002             |
| NANOG                       | 1816             | 22062          | 27.0           | homeo                 | C0006             |
| ETS1                        | 1847             | 22501          | 26.9           | ETS                   | C0016             |
| SMAD3                       | 2343             | 29403          | 26.9           | SMAD                  | C0041             |
| SP3                         | 2308             | 28919          | 26.9           | CH                    | C0001             |
| LFA1 <sup>‡</sup>           | 2267             | 28678          | 24.4           |                       |                   |
| ZID                         | 2321             | 29502          | 23.9           | CH                    | C0001             |

| TFBS*                | Hits in Gene Set | Hits on Genome | $-\log_{10} P$ | TF Class                | TransFac Class ID |
|----------------------|------------------|----------------|----------------|-------------------------|-------------------|
| LMO2COM              | 1833             | 22717          | 23.5           | LIM                     | C0028             |
| NRF2                 | 2530             | 32616          | 22.9           | ETS <sup>†</sup>        | C0016             |
|                      |                  |                |                | bZIP <sup>†</sup>       | C0008             |
| MYOGENIN             | 1479             | 18024          | 21.8           | bHLH                    | C0010             |
| ARP1                 | 1412             | 17149          | 21.3           | CC (rec)                | C0002             |
| HFH3                 | 3117             | 41393          | 20.6           | fork head               | C0023             |
| IK3                  | 778              | 8744           | 19.6           | CH                      | C0001             |
| CHX10                | 859              | 9846           | 19.3           | homeo                   | C0006             |
| TCF4                 | 1025             | 12126          | 18.8           | HMG                     | C0015             |
| CIZ                  | 862              | 9945           | 18.6           | CH                      | C0001             |
| CREBATF              | 1425             | 17756          | 17.8           | bZIP                    | C0008             |
| NKX25                | 1528             | 19198          | 17.8           | NK-2/Nkx                | C0053             |
| ATF4                 | 2025             | 26282          | 17.4           | bZIP                    | C0008             |
| ZNF219               | 822              | 9536           | 17.2           | CH                      | C0001             |
| HFH4                 | 787              | 9096           | 16.9           | fork head               | C0023             |
| SMAD3                | 2343             | 29403          | 26.9           | SMAD                    | C0041             |
| HFH1                 | 774              | 8925           | 16.9           | fork head               | C0023             |
| CDP                  | 618              | 6892           | 16.4           | homeo                   | C0006             |
| SOX                  | 587              | 6496           | 16.3           | HMG                     | C0015             |
| AP2ALPHA             | 1103             | 13468          | 16.3           | bHSH                    | C0032             |
| AML                  | 1439             | 18339          | 14.9           | runt                    | C0029             |
| NFKAPPAB             | 1829             | 23956          | 14.5           | Rel                     | C0020             |
| ELF1                 | 944              | 11549          | 13.9           | Grainyhead <sup>†</sup> | C0051             |
|                      |                  |                |                | ETS <sup>†</sup>        | C0016             |
| NFE2                 | 914              | 11215          | 13.2           | bZIP                    | C0008             |
| E47                  | 1168             | 14763          | 13.2           | bHLH                    | C0010             |
| ATF3                 | 1238             | 15751          | 13.2           | bZIP                    | C0008             |
| TGIF                 | 729              | 8716           | 12.8           | homeo                   | C0006             |
| XFD1                 | 512              | 5806           | 12.6           | fork head               | C0023             |
| PEA3                 | 1662             | 21887          | 12.5           | ETS                     | C0016             |
| R <sup>‡</sup>       | 733              | 8819           | 12.3           |                         |                   |
| FOXO3                | 319              | 3332           | 12.1           | fork head               | C0023             |
| HES1                 | 1920             | 25756          | 11.7           | bHLH                    | C0010             |
| ETS2                 | 953              | 11968          | 11.5           | ETS                     | C0016             |
| RSRFC4               | 324              | 3454           | 11.2           | MADS                    | C0014             |
| NKX22                | 526              | 6138           | 11.0           | NK-2/Nkx                | C0053             |
| OCT                  | 500              | 5806           | 10.8           | POU                     | C0007             |
| MEIS1AHOXA9          | 423              | 4781           | 10.8           | homeo                   | C0006             |
| AFP1 <sup>‡</sup>    | 353              | 3869           | 10.7           |                         |                   |
| RREB1                | 1292             | 16902          | 10.6           | CH                      | C0001             |
| GFI1B                | 472              | 5477           | 10.3           | CH                      | C0001             |
| FREAC2               | 284              | 3014           | 10.1           | fork head               | C0023             |
| TAL1ALPHA47          | 495              | 5814           | 10.0           | bHLH                    | C0010             |
| MYC                  | 1754             | 23703          | 9.9            | bHLH-ZIP                | C0012             |
| PEBP                 | 1286             | 16969          | 9.7            | runt                    | C0029             |
| E2 <sup>‡</sup>      | 614              | 7487           | 9.6            |                         |                   |
| PADS <sup>‡</sup>    | 493              | 5913           | 8.8            |                         |                   |
| XFD2                 | 383              | 4440           | 8.6            | fork head               | C0023             |
| EGR1                 | 300              | 3338           | 8.6            | CH                      | C0001             |
| NMYC                 | 1329             | 17846          | 8.3            | bHLH-ZIP                | C0012             |
| OSF2                 | 795              | 10228          | 8.0            | runt                    | C0029             |
| HNF6                 | 151              | 1479           | 7.9            | homeo                   | C0006             |
| NGFIC                | 252              | 2780           | 7.6            | CH                      | C0001             |
| BLIMP1               | 169              | 1716           | 7.6            | CH                      | C0001             |
| MEIS1BHOXA9          | 207              | 2213           | 7.4            | homeo                   | C0006             |
| RORA                 | 549              | 6870           | 7.2            | CC (rec)                | C0002             |
| DEC                  | 787              | 10307          | 6.8            | bHLH                    | C0010             |
| ZTA                  | 568              | 7222           | 6.6            | bZIP                    | C0008             |
| CLOX                 | 100              | 930            | 6.5            | homeo                   | C0006             |
| GCM                  | 355              | 4276           | 6.4            | GCM                     | C0031             |
| RP58                 | 117              | 1148           | 6.3            | CH+BTB/POZ              | C0058             |
| ATF1                 | 491              | 6207           | 6.1            | bZIP                    | C0008             |
| YY1                  | 578              | 7443           | 6.0            | CH                      | C0001             |
| CETS168              | 955              | 12878          | 6.0            | ETS                     | C0016             |
| E12                  | 647              | 8453           | 5.9            | bHLH                    | C0010             |
| TAL1BETAITF2         | 244              | 2849           | 5.6            | bHLH                    | C0010             |
| E2F4DP2 <sup>‡</sup> | 365              | 4525           | 5.4            |                         |                   |
| STAT5A               | 238              | 2785           | 5.4            | STAT                    | C0039             |
| ICSBP                | 175              | 1947           | 5.4            | trp                     | C0022             |
| POU3F2               | 91               | 878            | 5.3            | POU                     | C0007             |

| TFBS*                  | Hits in Gene Set | Hits on Genome | $-\log_{10} P$ | TF Class  | TransFac Class ID |
|------------------------|------------------|----------------|----------------|-----------|-------------------|
| TALIBETAE47            | 263              | 3131           | 5.3            | bHLH      | C0010             |
| TFE                    | 1014             | 13897          | 5.2            | bHLH-ZIP  | C0012             |
| PBX1                   | 115              | 1186           | 5.2            | homeo     | C0006             |
| GRE                    | 230              | 2709           | 5.0            | CC (rec)  | C0002             |
| CDPCR3                 | 200              | 2306           | 5.0            | homeo     | C0006             |
| HIF1                   | 650              | 8663           | 4.9            | bHLH      | C0010             |
| PTF1BETA <sup>‡</sup>  | 166              | 1879           | 4.7            |           |                   |
| SREBP                  | 395              | 5049           | 4.6            | bHLH-ZIP  | C0012             |
| HSF1                   | 193              | 2261           | 4.5            | HSF       | C0050             |
| AREB6                  | 1710             | 24574          | 4.0            | CH+homeo  | C0021             |
| E4BP4                  | 92               | 970            | 3.9            | bZIP      | C0008             |
| ATF                    | 269              | 3416           | 3.6            | bZIP      | C0008             |
| E2F1DP1RB <sup>‡</sup> | 124              | 1419           | 3.5            |           |                   |
| FREAC4                 | 69               | 704            | 3.5            | fork head | C0023             |
| FXR                    | 179              | 2174           | 3.5            | CC (rec)  | C0002             |
| CREBP1CJUN             | 251              | 3183           | 3.4            | bZIP      | C0008             |
| AHRARNT                | 389              | 5199           | 3.1            | bHLH      | C0010             |
| XFD3                   | 138              | 1647           | 3.1            | fork head | C0023             |
| ATATA <sup>‡</sup>     | 29               | 242            | 3.1            |           |                   |
| SREBP1                 | 584              | 8106           | 2.9            | bHLH-ZIP  | C0012             |
| UF1H3BETA <sup>‡</sup> | 89               | 1008           | 2.9            |           |                   |
| STAT5B                 | 86               | 970            | 2.8            | STAT      | C0039             |
| AHR                    | 131              | 1580           | 2.8            | bHLH      | C0010             |
| RORA1                  | 287              | 3791           | 2.8            | CC (rec)  | C0002             |
| ISRE <sup>‡</sup>      | 48               | 485            | 2.7            |           |                   |
| BACH1                  | 38               | 376            | 2.4            | bZIP      | C0008             |
| HOXA7                  | 67               | 749            | 2.4            | homeo     | C0006             |

The downregulated gene set of 1,603 genes was analyzed in Whole Genome rVISTA<sup>1</sup> to search for human sequences (UCSC version hg18, NCBI Build 36.1) conserved in alignment with mouse (UCSC version mm8, NCBI Build 36). The 5 kb region upstream from the transcription start site of each gene was examined for transcription factor binding site (TFBS) enrichment using a p-value cutoff of 0.006. Of the 1,603 downregulated genes, 23 (1.4%) were not found in the database resulting in an analysis of 1,580 genes. The 1,580 genes contained 144 overrepresented TFBSs when compared to the entire genome. Out of these 1,580 genes, 1,550 (98%) contain at least one binding site for one of the 144 overrepresented TFBSs with a range of one (16 genes) to 128 (2 genes) enriched TFBSs and an average of 52 TFBSs per gene. The TRANSFAC<sup>®</sup> Professional library<sup>2</sup> was then used to obtain further information about the TFBSs and the transcription factors binding to them.

\*Transcription factor binding site

<sup>†</sup>Three TFBSs each mapped to two transcription factor classes.

<sup>‡</sup>No transcription factor had been assigned to this TFBS in TRANSFAC<sup>®</sup> and thus no TF Class nor TransFac Class ID is shown here.

**Table S3. Summary of Transcription Factor Classes for 144 TFBSs for Genes with Decreased Expression (N=1,550)**

| TF Class   | TransFac CLASS ID | N  | Duplicate* | N <sub>2</sub> * | Proportion | Cumulative |
|------------|-------------------|----|------------|------------------|------------|------------|
| fork head  | C0023             | 15 |            | 15               | 0.122      | 0.122      |
| homeo      | C0006             | 16 | 1          | 15               | 0.122      | 0.244      |
| CH         | C0001             | 14 |            | 14               | 0.114      | 0.358      |
| bZIP       | C0008             | 14 | 1          | 13               | 0.106      | 0.463      |
| bHLH       | C0010             | 11 |            | 11               | 0.089      | 0.553      |
| CC (rec)   | C0002             | 9  |            | 9                | 0.073      | 0.626      |
| bHLH-ZIP   | C0012             | 6  |            | 6                | 0.049      | 0.675      |
| HMG        | C0015             | 5  |            | 5                | 0.041      | 0.715      |
| ETS        | C0016             | 6  | 2          | 4                | 0.033      | 0.748      |
| POU        | C0007             | 4  |            | 4                | 0.033      | 0.780      |
| CC (g)     | C0003             | 3  |            | 3                | 0.024      | 0.805      |
| NK-2/Nkx   | C0053             | 4  | 1          | 3                | 0.024      | 0.829      |
| runt       | C0029             | 3  |            | 3                | 0.024      | 0.854      |
| trp        | C0022             | 3  |            | 3                | 0.024      | 0.878      |
| MADS       | C0014             | 2  |            | 2                | 0.016      | 0.894      |
| STAT       | C0039             | 2  |            | 2                | 0.016      | 0.911      |
| bHSH       | C0032             | 1  |            | 1                | 0.008      | 0.919      |
| CH+BTB/POZ | C0058             | 1  |            | 1                | 0.008      | 0.927      |
| CH+homeo   | C0021             | 1  |            | 1                | 0.008      | 0.935      |
| GCM        | C0031             | 1  |            | 1                | 0.008      | 0.943      |
| Grainyhead | C0051             | 2  | 1          | 1                | 0.008      | 0.951      |
| HSF        | C0050             | 1  |            | 1                | 0.008      | 0.959      |
| LIM        | C0028             | 1  |            | 1                | 0.008      | 0.967      |
| LIM-homeo  | C0025             | 1  |            | 1                | 0.008      | 0.976      |
| Rel        | C0020             | 1  |            | 1                | 0.008      | 0.984      |
| SMAD       | C0041             | 1  |            | 1                | 0.008      | 0.992      |
| TEA        | C0024             | 1  |            | 1                | 0.008      | 1.000      |

\*Three binding sites mapped to more than 1 TF class.

**Table S4. Enriched Gene Ontology (GO) Categories for Genes with Decreased Expression (N=1,242\*)**

| GO Term                                                                  | GO ID   | GO Size | Expect. Count | Count | Odds Ratio | P-value  |
|--------------------------------------------------------------------------|---------|---------|---------------|-------|------------|----------|
| cell adhesion                                                            | 0007155 | 690     | 67.16         | 124   | 2.15       | 5.15E-12 |
| cell morphogenesis                                                       | 0000902 | 496     | 48.27         | 87    | 2.05       | 3.01E-08 |
| muscle development                                                       | 0007517 | 64      | 6.15          | 22    | 5.00       | 5.32E-08 |
| negative regulation of biological process                                | 0048519 | 1338    | 130.22        | 187   | 1.60       | 8.33E-08 |
| localization of cell                                                     | 0051674 | 432     | 42.05         | 77    | 2.08       | 9.68E-08 |
| regulation of locomotion                                                 | 0040012 | 127     | 12.36         | 33    | 3.32       | 1.01E-07 |
| cell-matrix adhesion                                                     | 0007160 | 89      | 8.66          | 25    | 3.68       | 7.32E-07 |
| anatomical structure development                                         | 0048856 | 330     | 30.28         | 58    | 2.18       | 8.48E-07 |
| cell motility                                                            | 0048870 | 286     | 27.84         | 54    | 2.21       | 1.34E-06 |
| regulation of cell motion                                                | 0051270 | 81      | 7.82          | 23    | 3.76       | 1.43E-06 |
| embryonic development                                                    | 0009790 | 356     | 34.65         | 62    | 2.01       | 3.82E-06 |
| regulation of anatomical structure morphogenesis                         | 0022603 | 307     | 29.88         | 55    | 2.07       | 5.67E-06 |
| regulation of cell growth                                                | 0001558 | 124     | 12.07         | 29    | 2.87       | 5.94E-06 |
| heart development                                                        | 0007507 | 144     | 14.02         | 32    | 2.69       | 6.34E-06 |
| regulation of cell size                                                  | 0008361 | 163     | 15.86         | 34    | 2.49       | 1.41E-05 |
| regulation of cellular component organization                            | 0051128 | 420     | 40.66         | 68    | 1.85       | 1.41E-05 |
| striated muscle development                                              | 0014706 | 128     | 12.46         | 28    | 2.63       | 3.20E-05 |
| cellular developmental process                                           | 0048869 | 1459    | 142.00        | 186   | 1.42       | 3.93E-05 |
| circulatory system process                                               | 0003013 | 188     | 18.30         | 36    | 2.23       | 5.55E-05 |
| regulation of blood vessel size                                          | 0050880 | 56      | 5.45          | 16    | 3.75       | 5.70E-05 |
| negative regulation of RNA metabolic process                             | 0051253 | 254     | 24.72         | 44    | 1.98       | 0.00011  |
| positive regulation of cell migration                                    | 0030335 | 53      | 5.16          | 15    | 3.69       | 0.00011  |
| pattern specification process                                            | 0007389 | 180     | 17.52         | 34    | 2.19       | 0.00012  |
| negative regulation of transcription                                     | 0016481 | 333     | 32.41         | 54    | 1.83       | 0.00012  |
| actin cytoskeleton organization                                          | 0030036 | 113     | 10.90         | 24    | 2.56       | 0.00016  |
| negative regulation of cellular metabolic process                        | 0031324 | 506     | 49.25         | 74    | 1.63       | 0.00022  |
| regulation of vasoconstriction                                           | 0019229 | 15      | 1.46          | 7     | 8.17       | 0.00026  |
| kidney development                                                       | 0001822 | 51      | 4.96          | 14    | 3.54       | 0.00026  |
| skeletal system development                                              | 0001501 | 264     | 25.69         | 44    | 1.89       | 0.00026  |
| smooth muscle contraction                                                | 0006939 | 35      | 3.41          | 11    | 4.28       | 0.00033  |
| negative regulation of biosynthetic process                              | 0009890 | 406     | 39.52         | 61    | 1.67       | 0.00038  |
| chordate embryonic development                                           | 0043009 | 184     | 17.91         | 33    | 2.05       | 0.00040  |
| negative regulation of transcription from RNA polymerase II promoter     | 0000122 | 178     | 17.32         | 32    | 2.06       | 0.00046  |
| regulation of cell shape                                                 | 0008360 | 42      | 4.09          | 12    | 3.74       | 0.00048  |
| growth                                                                   | 0040007 | 322     | 31.34         | 50    | 1.73       | 0.00059  |
| response to heat                                                         | 0009408 | 27      | 2.63          | 9     | 4.66       | 0.00070  |
| integrin-mediated signaling pathway                                      | 0007229 | 51      | 4.96          | 13    | 3.20       | 0.00093  |
| homophilic cell adhesion                                                 | 0007156 | 126     | 12.26         | 24    | 2.21       | 0.00099  |
| cell junction organization                                               | 0034330 | 23      | 2.24          | 8     | 4.97       | 0.00102  |
| actin filament organization                                              | 0007015 | 98      | 9.54          | 20    | 2.40       | 0.00105  |
| BMP signaling pathway                                                    | 0030509 | 52      | 5.06          | 13    | 3.11       | 0.00113  |
| organ morphogenesis                                                      | 0009887 | 509     | 49.54         | 71    | 1.53       | 0.00114  |
| transmembrane receptor protein serine/threonine kinase signaling pathway | 0007178 | 120     | 11.68         | 23    | 2.22       | 0.00114  |
| neural tube formation                                                    | 0001841 | 19      | 1.85          | 7     | 5.44       | 0.00143  |
| glycogen metabolic process                                               | 0005977 | 41      | 3.99          | 11    | 3.42       | 0.00144  |
| limb development                                                         | 0060173 | 60      | 5.84          | 14    | 2.84       | 0.00153  |
| oxidation reduction                                                      | 0055114 | 567     | 55.18         | 77    | 1.49       | 0.00154  |
| gastrulation                                                             | 0007369 | 54      | 5.26          | 13    | 2.96       | 0.00164  |
| nervous system development                                               | 0007399 | 773     | 75.23         | 100   | 1.41       | 0.00168  |
| negative regulation of cell migration                                    | 0030336 | 42      | 4.09          | 11    | 3.31       | 0.00178  |
| glucan metabolic process                                                 | 0044042 | 42      | 4.09          | 11    | 3.31       | 0.00178  |
| system development                                                       | 0048731 | 814     | 76.50         | 101   | 1.40       | 0.00194  |
| regulation of signal transduction                                        | 0009966 | 599     | 58.30         | 80    | 1.46       | 0.0020   |
| extracellular structure organization                                     | 0043062 | 96      | 9.34          | 19    | 2.31       | 0.0020   |
| negative regulation of cell differentiation                              | 0045596 | 126     | 12.26         | 23    | 2.09       | 0.0022   |
| germ cell migration                                                      | 0008354 | 7       | 0.68          | 4     | 12.40      | 0.0025   |
| regulation of protein complex disassembly                                | 0043244 | 44      | 4.28          | 11    | 3.11       | 0.0027   |
| oxygen and reactive oxygen species metabolic process                     | 0006800 | 57      | 5.55          | 13    | 2.76       | 0.0028   |
| cellular polysaccharide metabolic process                                | 0044264 | 57      | 5.55          | 13    | 2.76       | 0.0028   |
| muscle cell differentiation                                              | 0042692 | 51      | 4.95          | 12    | 2.88       | 0.0029   |
| Notch signaling pathway                                                  | 0007219 | 51      | 4.96          | 12    | 2.87       | 0.0030   |
| regulation of muscle contraction                                         | 0006937 | 45      | 4.38          | 11    | 3.02       | 0.0032   |
| mesoderm formation                                                       | 0001707 | 27      | 2.63          | 8     | 3.92       | 0.0032   |
| appendage morphogenesis                                                  | 0035107 | 58      | 5.65          | 13    | 2.70       | 0.0032   |
| negative regulation of cell motion                                       | 0051271 | 4       | 0.39          | 3     | 28.06      | 0.0034   |

| GO Term                                                             | GO ID   | GO Size | Expect. |       | Odds  |         |
|---------------------------------------------------------------------|---------|---------|---------|-------|-------|---------|
|                                                                     |         |         | Count   | Count | Ratio | P-value |
| regulation of amyloid precursor protein biosynthetic process        | 0042984 | 4       | 0.39    | 3     | 27.89 | 0.0034  |
| cytoskeleton organization                                           | 0007010 | 156     | 14.89   | 26    | 1.92  | 0.0034  |
| ureteric bud development                                            | 0001657 | 22      | 2.14    | 7     | 4.35  | 0.0037  |
| neural tube closure                                                 | 0001843 | 12      | 1.17    | 5     | 6.65  | 0.0038  |
| embryonic skeletal system morphogenesis                             | 0048704 | 40      | 3.89    | 10    | 3.11  | 0.0041  |
| anterior/posterior pattern formation                                | 0009952 | 95      | 9.25    | 18    | 2.19  | 0.0043  |
| enzyme linked receptor protein signaling pathway                    | 0007167 | 238     | 22.95   | 36    | 1.69  | 0.0043  |
| positive regulation of mesenchymal cell proliferation               | 0002053 | 8       | 0.78    | 4     | 9.30  | 0.0045  |
| regulation of smooth muscle cell migration                          | 0014910 | 8       | 0.78    | 4     | 9.30  | 0.0045  |
| platelet-derived growth factor receptor signaling pathway           | 0048008 | 8       | 0.78    | 4     | 9.30  | 0.0045  |
| negative regulation of cell proliferation                           | 0008285 | 271     | 26.38   | 40    | 1.63  | 0.0049  |
| protein depolymerization                                            | 0051261 | 41      | 3.99    | 10    | 3.01  | 0.0050  |
| multicellular organismal process                                    | 0032501 | 3433    | 334.13  | 373   | 1.19  | 0.0052  |
| myofibril assembly                                                  | 0030239 | 18      | 1.75    | 6     | 4.65  | 0.0056  |
| positive regulation of fibroblast proliferation                     | 0048146 | 18      | 1.75    | 6     | 4.65  | 0.0056  |
| negative regulation of microtubule depolymerization                 | 0007026 | 13      | 1.27    | 5     | 5.82  | 0.0057  |
| cell-cell junction assembly                                         | 0007043 | 13      | 1.27    | 5     | 5.82  | 0.0057  |
| mesoderm development                                                | 0007498 | 55      | 5.35    | 12    | 2.60  | 0.0058  |
| positive regulation of epithelial cell proliferation                | 0050679 | 24      | 2.34    | 7     | 3.83  | 0.0064  |
| response to calcium ion                                             | 0051592 | 30      | 2.92    | 8     | 3.39  | 0.0066  |
| cell projection assembly                                            | 0030031 | 63      | 6.13    | 13    | 2.43  | 0.0068  |
| tube morphogenesis                                                  | 0035239 | 63      | 6.13    | 13    | 2.43  | 0.0068  |
| negative regulation of cell communication                           | 0010648 | 146     | 14.21   | 24    | 1.84  | 0.0073  |
| regulation of systemic arterial blood pressure by renin-angiotensin | 0003081 | 9       | 0.88    | 4     | 7.44  | 0.0075  |
| middle ear morphogenesis                                            | 0042474 | 9       | 0.88    | 4     | 7.44  | 0.0075  |
| artery morphogenesis                                                | 0048844 | 9       | 0.88    | 4     | 7.44  | 0.0075  |
| cytokinesis                                                         | 0000910 | 37      | 3.60    | 9     | 3.00  | 0.0077  |
| muscle cell proliferation                                           | 0033002 | 37      | 3.60    | 9     | 3.00  | 0.0077  |
| Golgi to plasma membrane transport                                  | 0006893 | 5       | 0.49    | 3     | 13.94 | 0.0079  |
| cilium morphogenesis                                                | 0060271 | 5       | 0.49    | 3     | 13.94 | 0.0079  |
| ossification                                                        | 0001503 | 116     | 11.29   | 20    | 1.95  | 0.0081  |
| regulation of cellular protein metabolic process                    | 0032268 | 331     | 32.22   | 46    | 1.52  | 0.0084  |
| muscle contraction                                                  | 0006936 | 102     | 9.85    | 18    | 2.02  | 0.0084  |
| embryonic limb morphogenesis                                        | 0030326 | 51      | 4.96    | 11    | 2.56  | 0.0088  |
| muscle cell development                                             | 0055001 | 20      | 1.95    | 6     | 3.99  | 0.0098  |

\*The downregulated gene list was used to identify enriched GO biological process categories with a software package available using R and Bioconductor.<sup>3,4</sup> A total of 1,242 genes with GO annotations were included into the analysis. This represents 77.5% of the total number of 1,603 genes with decreased expression in AAA tissue samples and analyzed with Whole Genome rVISTA. The remaining 22.5% did not have functional annotations as of June 6, 2009. The reference gene set was the 18,057 distinct genes represented on both Affymetrix and Illumina arrays based on our initial microarray studies.<sup>5</sup> Only GO categories with more than 2 genes and a nominal  $P < 0.01$  using the hypergeometric test for enrichment are listed here..



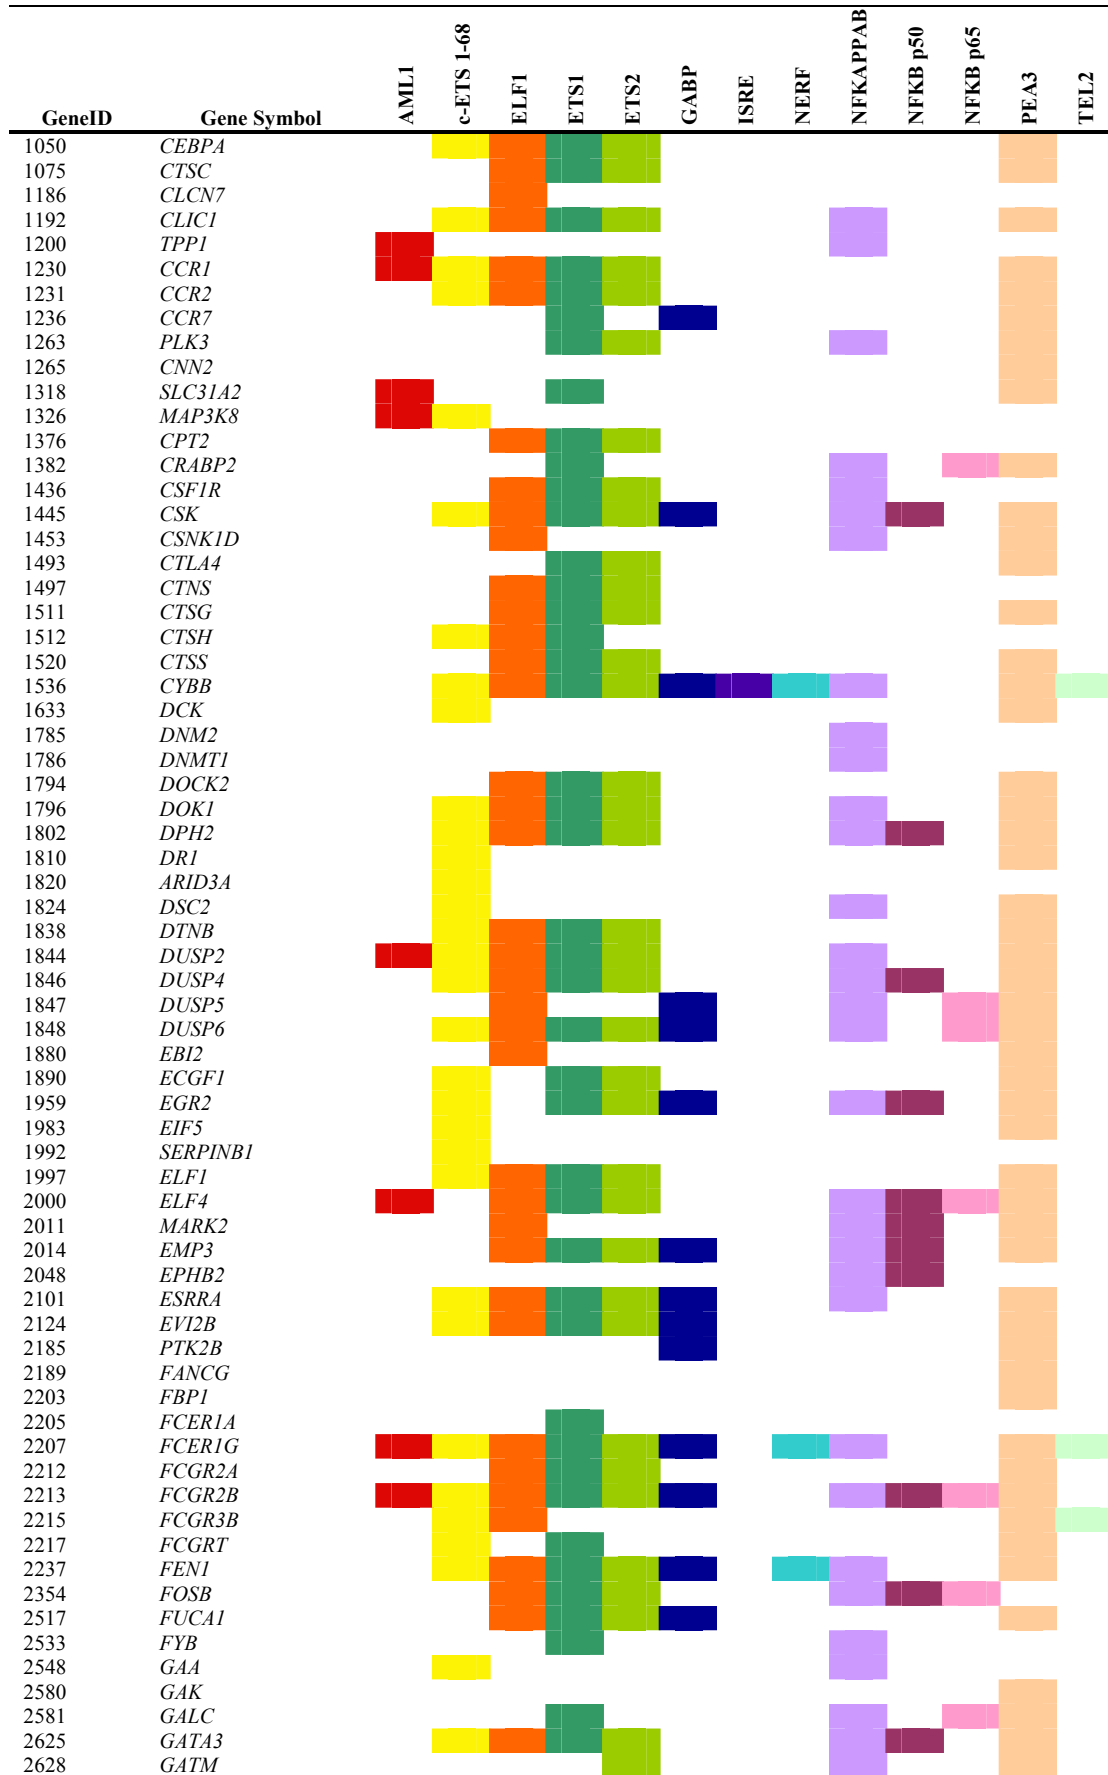





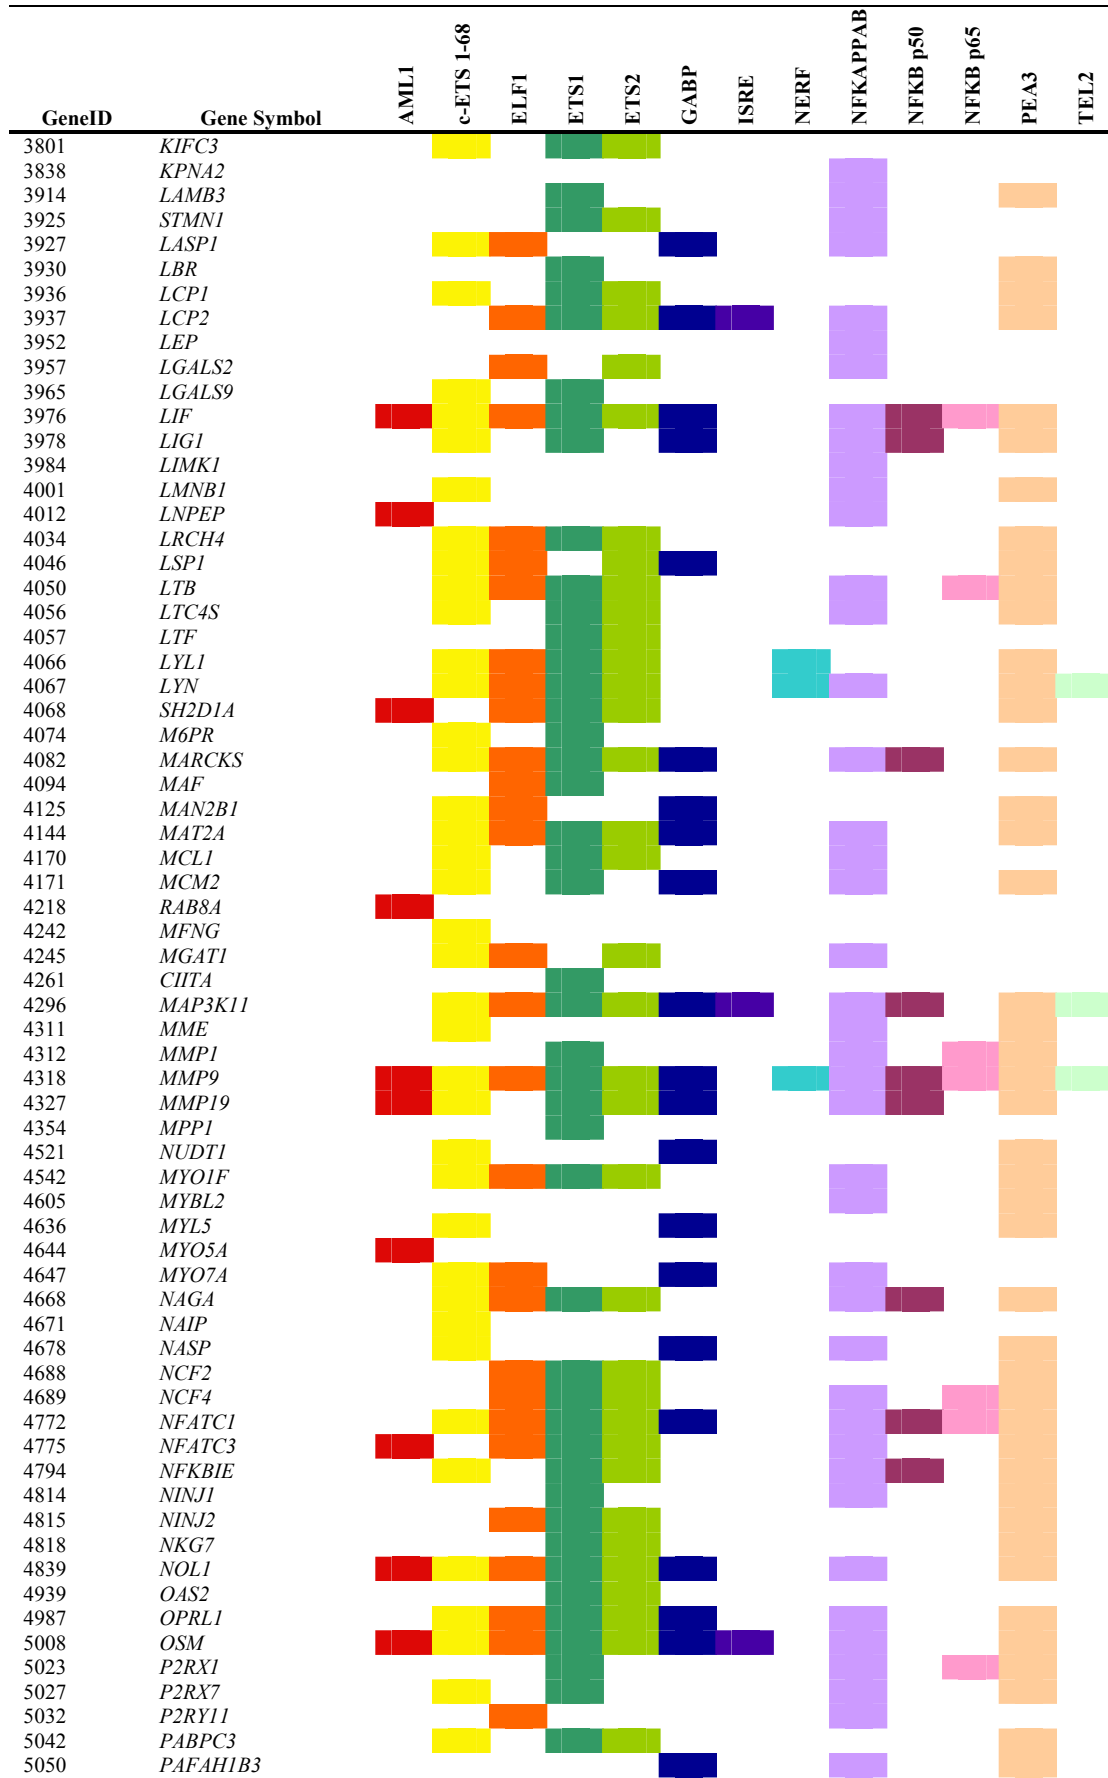



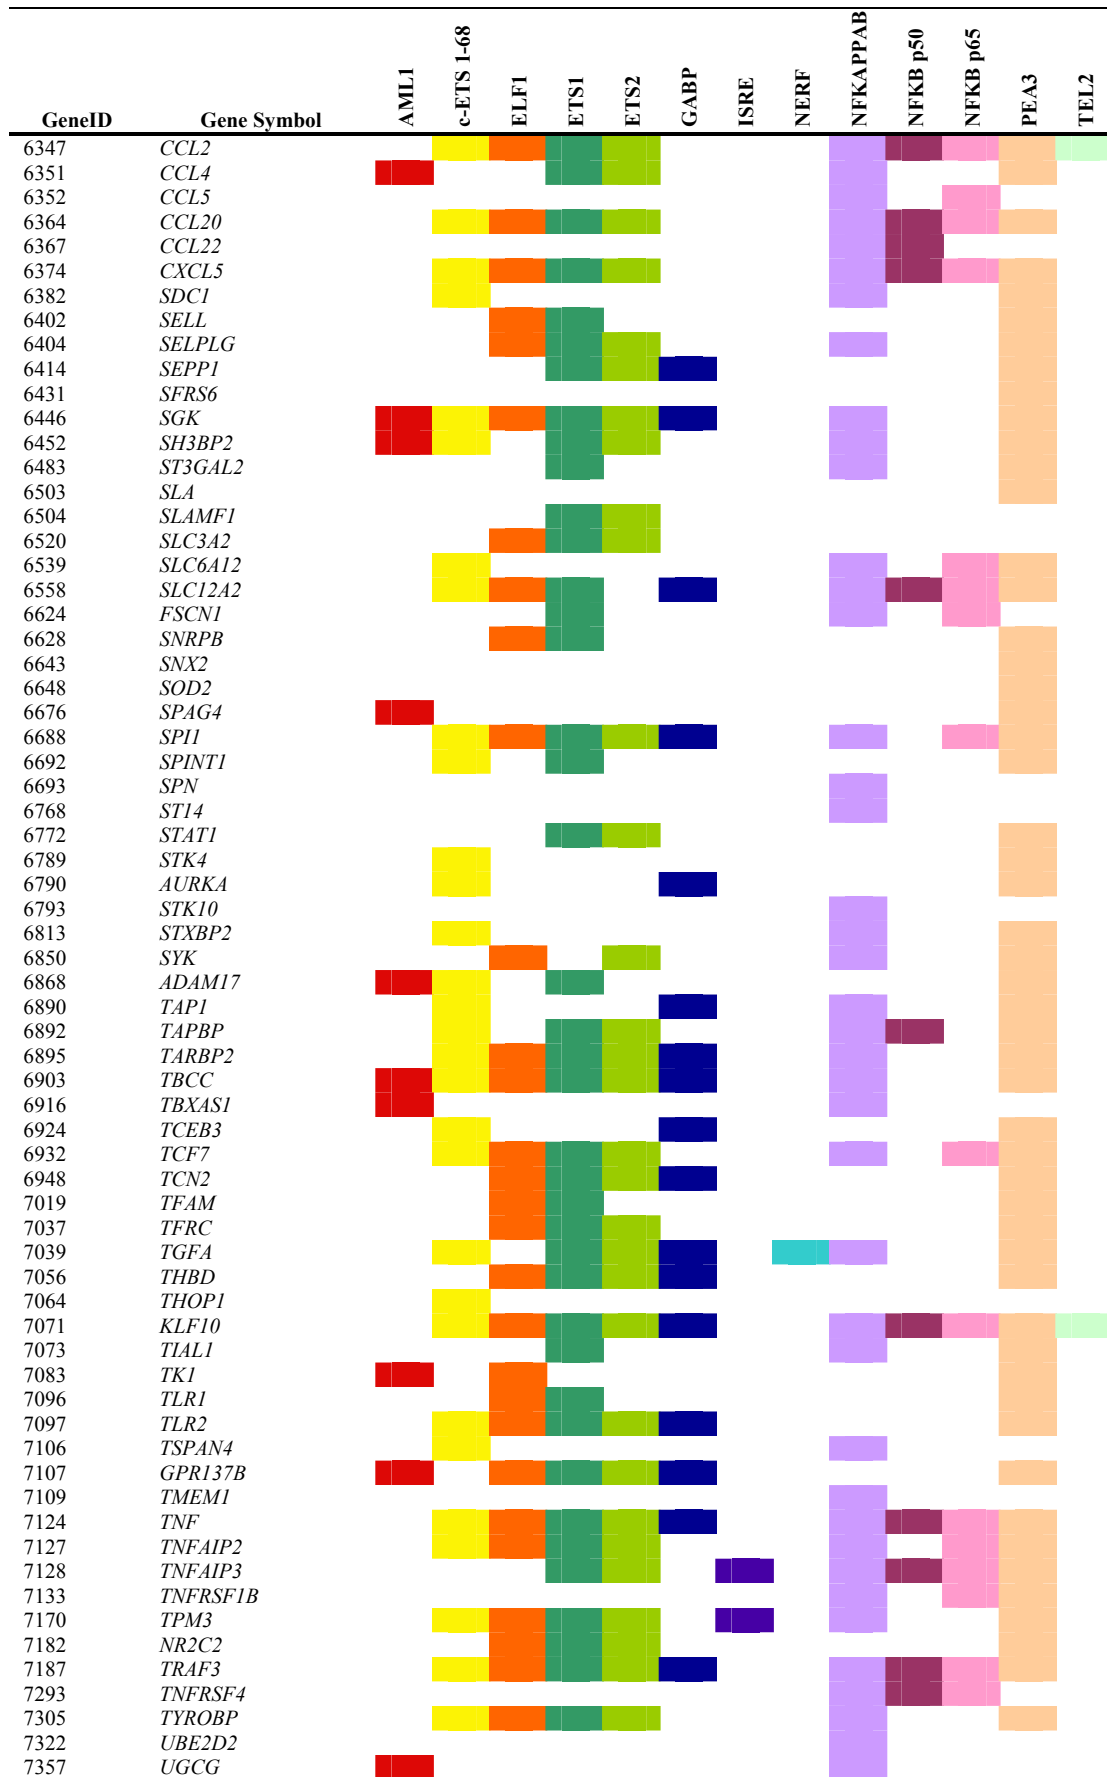

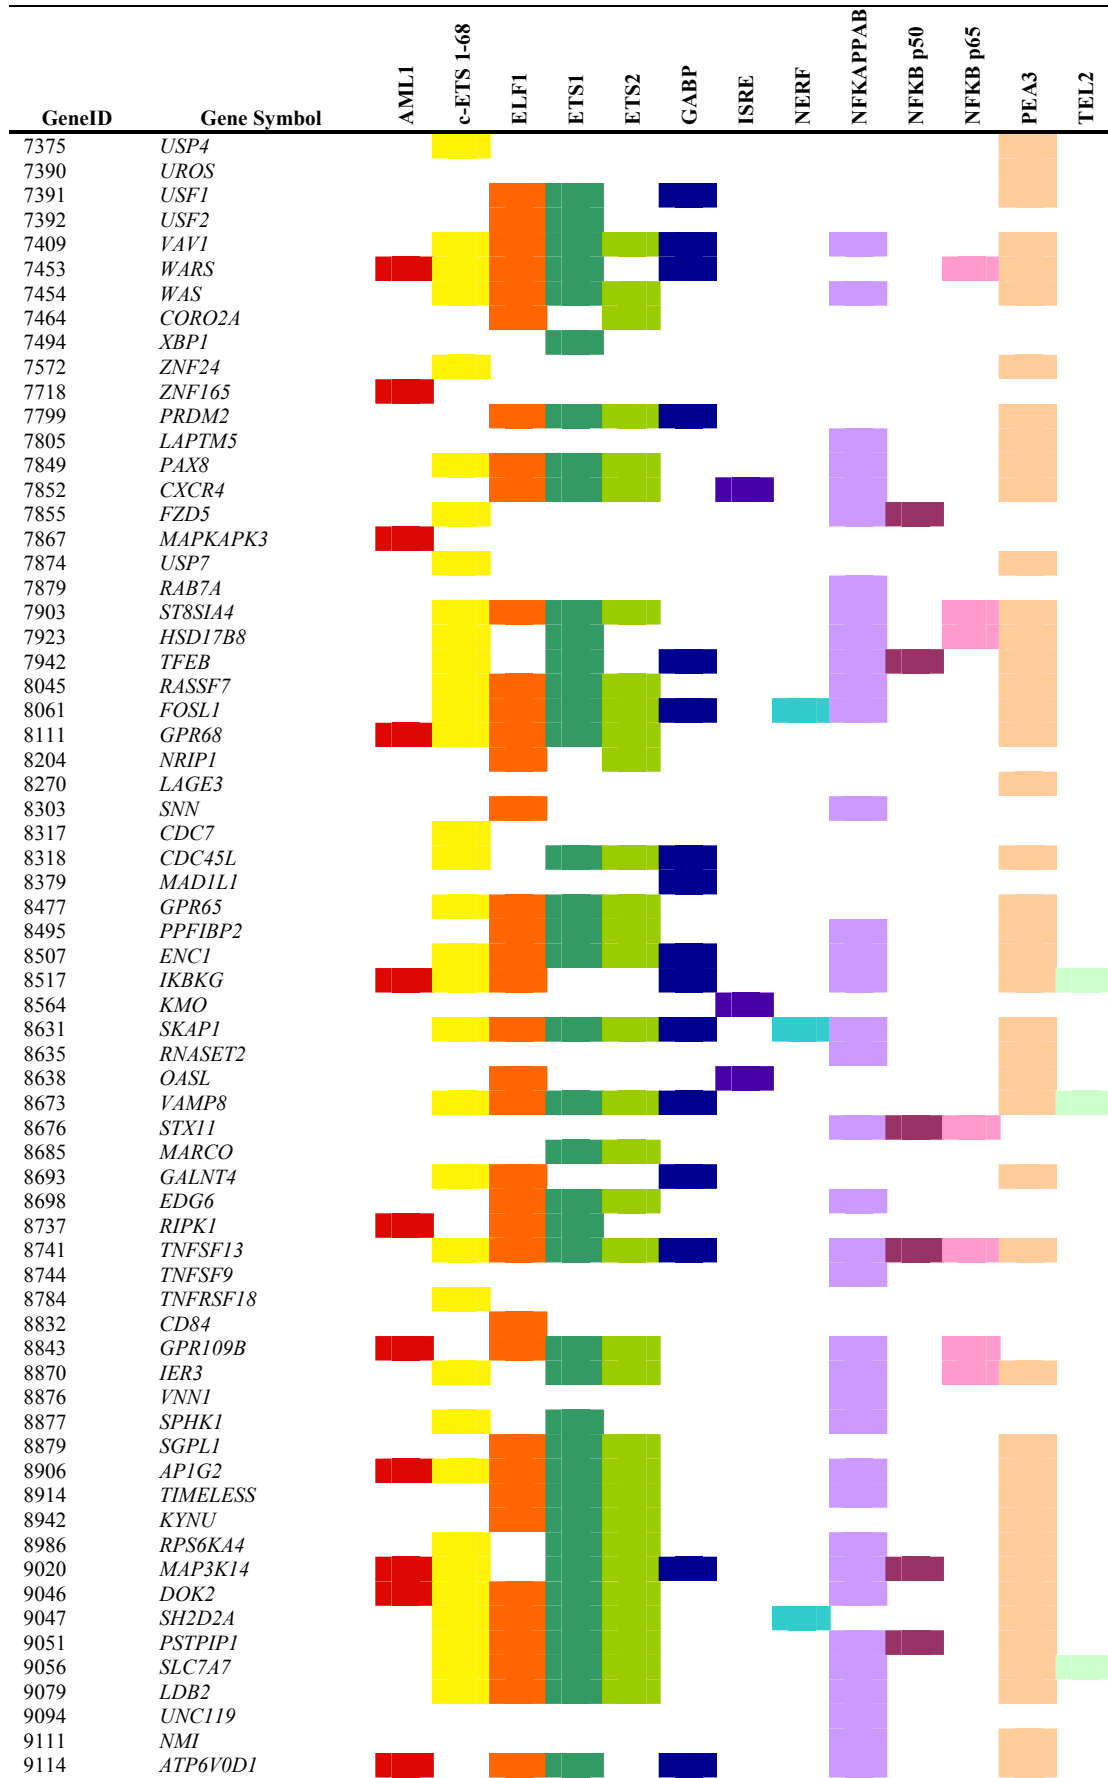

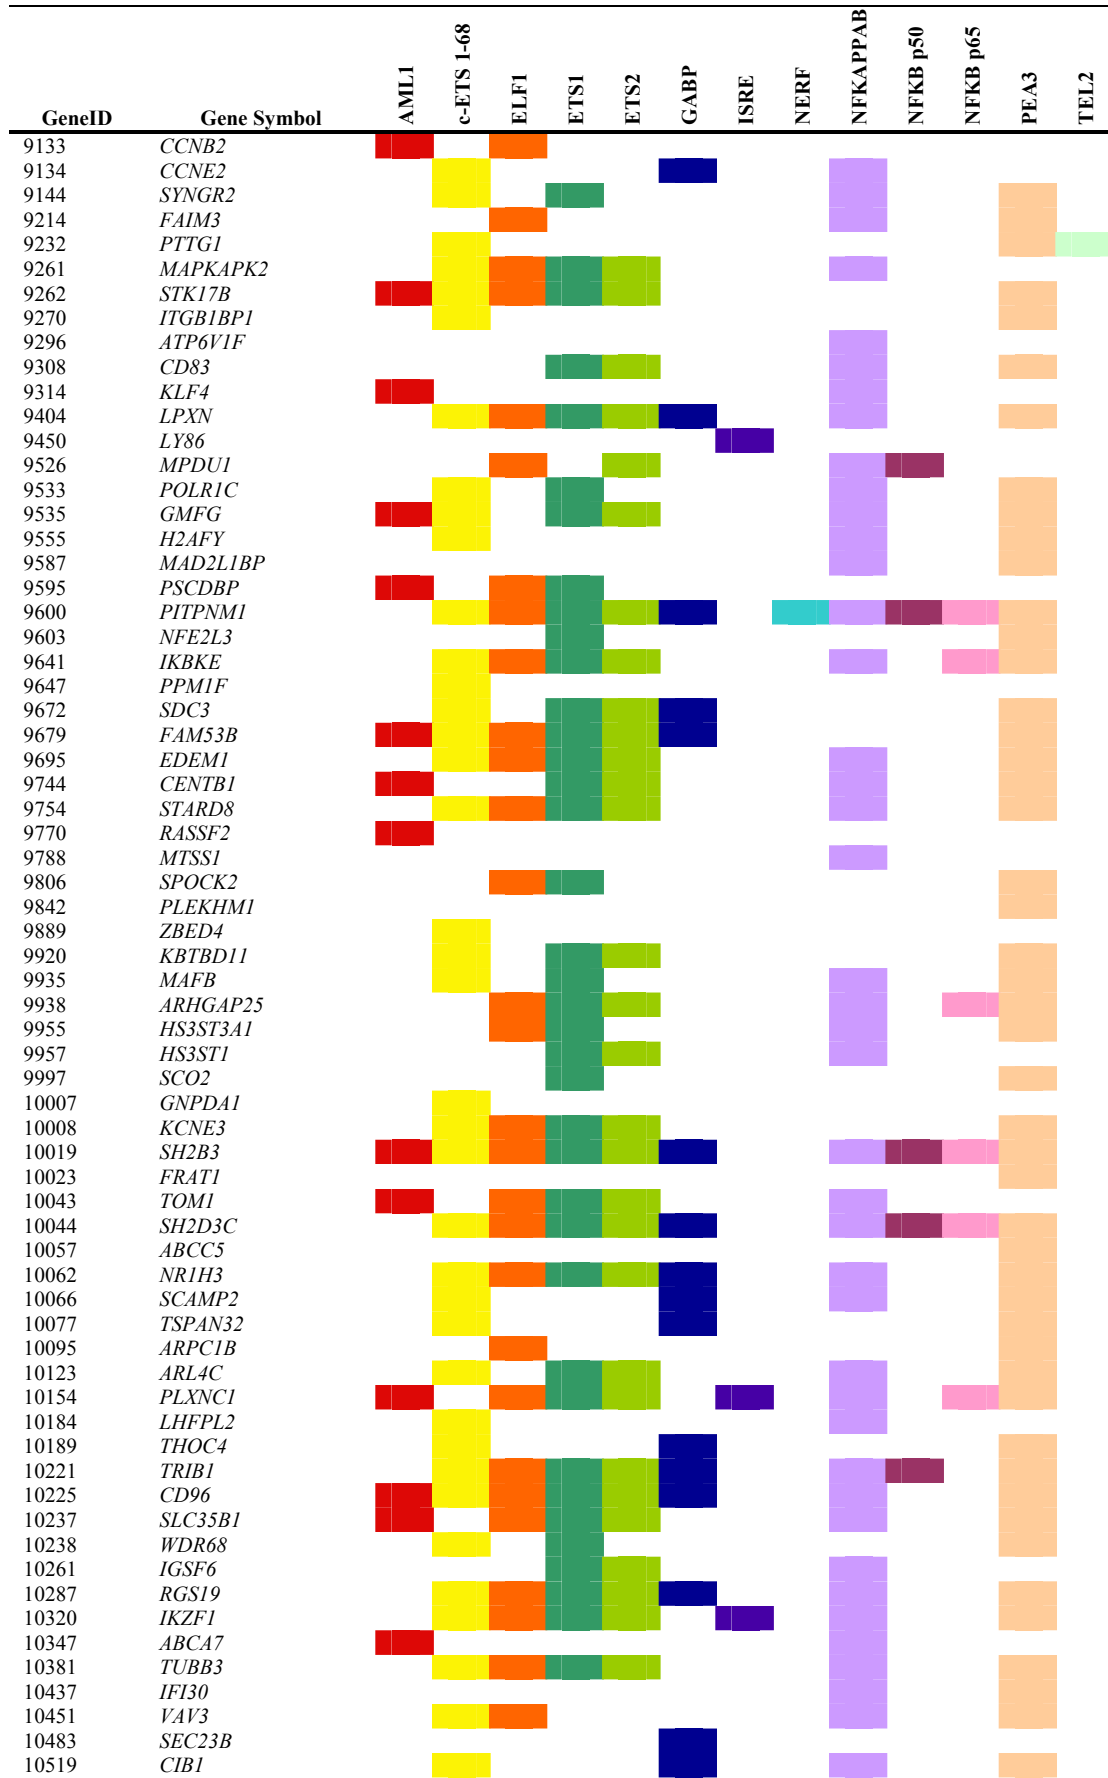

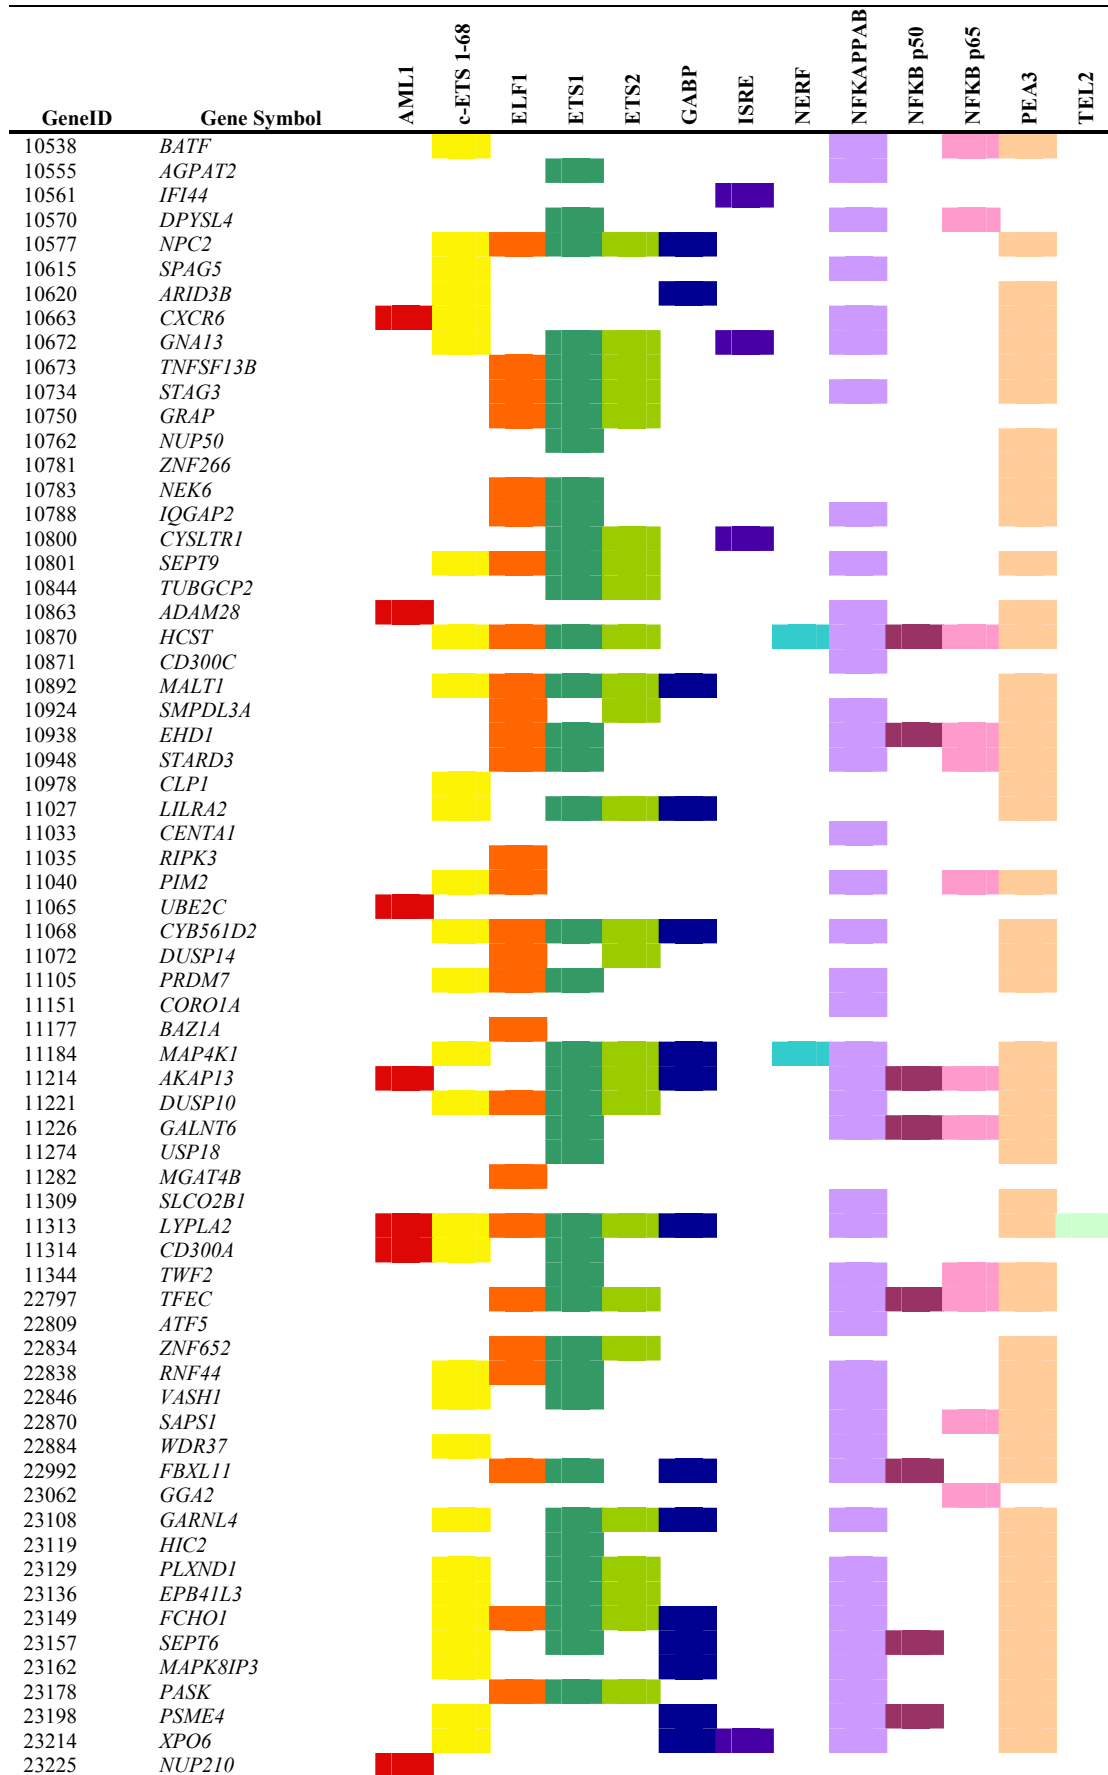







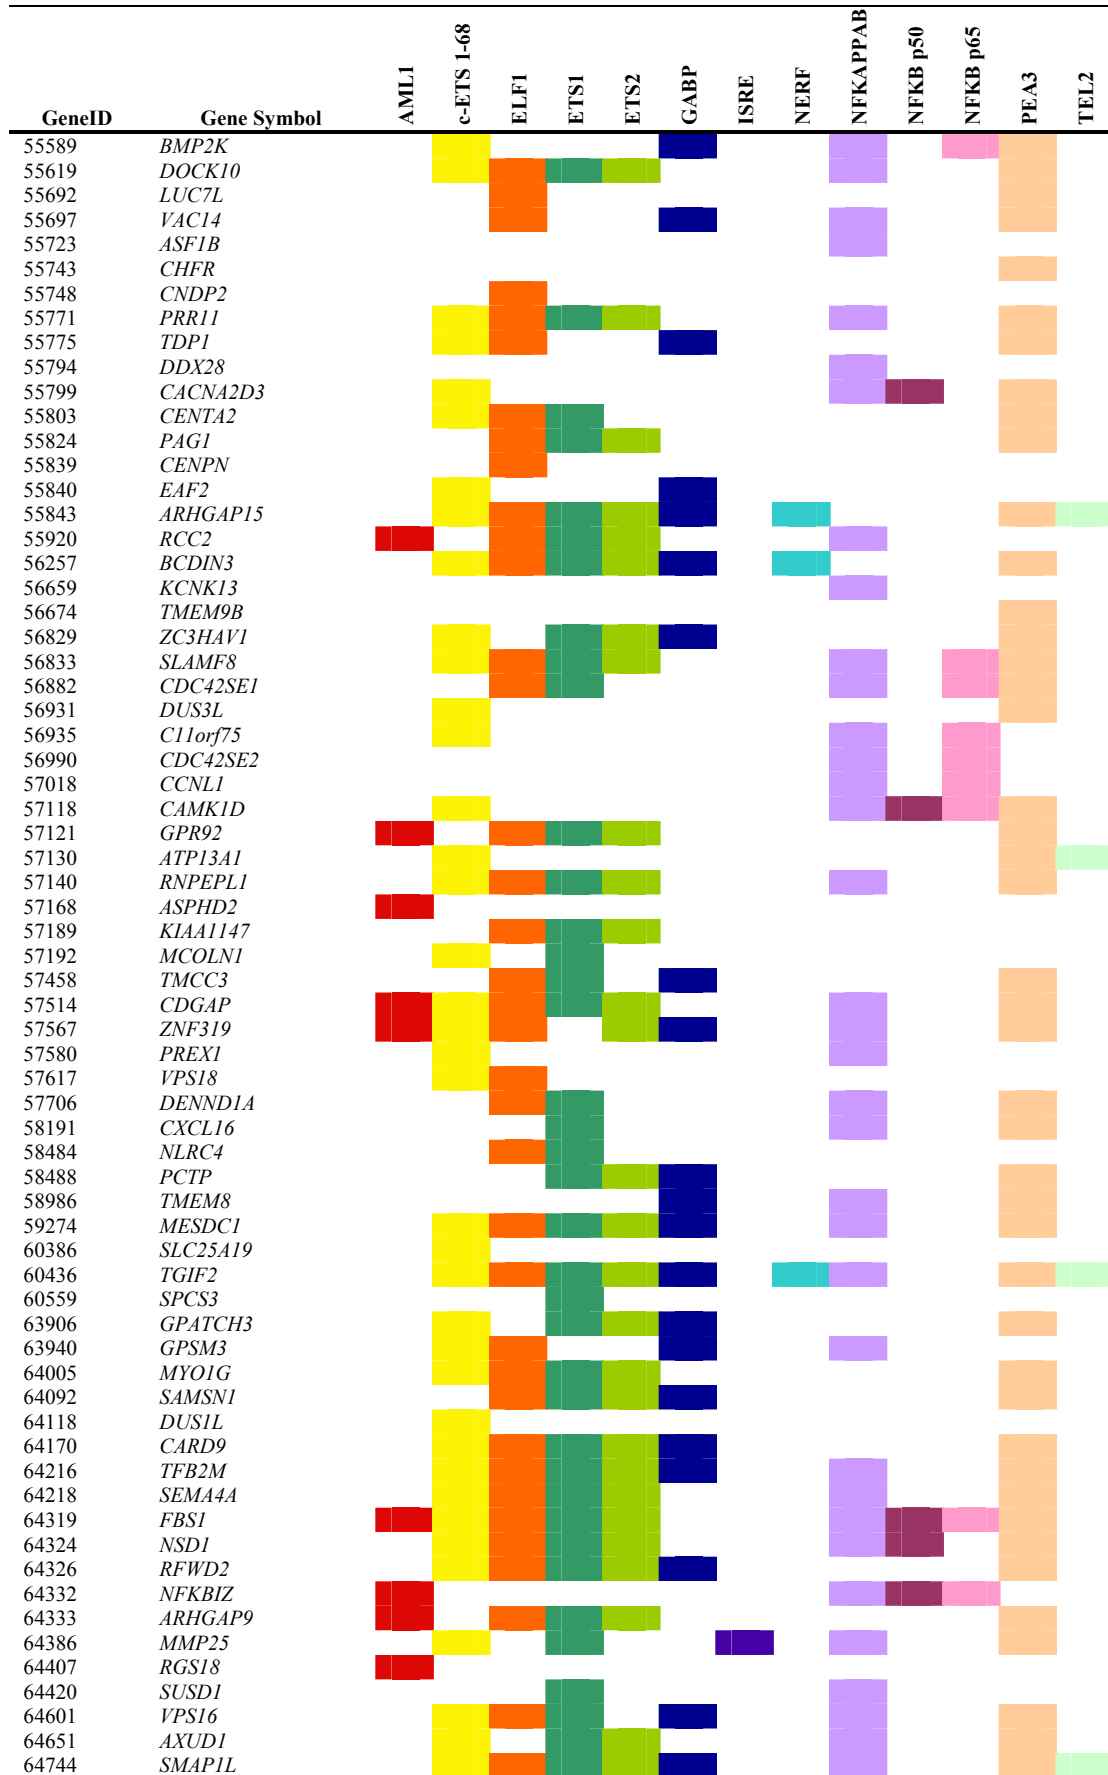





| GeneID | Gene Symbol     | AML1 | c-ETS 1-68 | ELF1 | ETS1 | ETS2 | GABP | ISRE | NERF | NFKAPPAB | NFKB p50 | NFKB p65 | PEA3 | TEL2 |
|--------|-----------------|------|------------|------|------|------|------|------|------|----------|----------|----------|------|------|
| 144108 | <i>SPTY2D1</i>  |      |            | ■    |      |      |      |      |      |          |          | ■        |      |      |
| 147138 | <i>TMC8</i>     |      |            | ■    | ■    | ■    |      |      |      |          |          |          | ■    |      |
| 150094 | <i>SNF1LK</i>   |      | ■          |      |      |      |      |      |      | ■        |          |          |      |      |
| 150290 | <i>DUSP18</i>   | ■    | ■          |      |      |      |      |      |      | ■        |          |          |      |      |
| 160364 | <i>CLEC12A</i>  |      |            | ■    | ■    | ■    |      |      |      |          |          |          | ■    |      |
| 160760 | <i>PPTC7</i>    |      |            | ■    | ■    | ■    |      |      |      |          |          |          | ■    |      |
| 162979 | <i>ZNF342</i>   |      | ■          | ■    | ■    | ■    |      | ■    |      |          |          |          | ■    |      |
| 162989 | <i>DEDD2</i>    |      | ■          | ■    | ■    | ■    |      | ■    |      | ■        |          |          | ■    |      |
| 163702 | <i>IL28RA</i>   | ■    | ■          | ■    | ■    | ■    |      | ■    |      |          |          |          | ■    |      |
| 165530 | <i>CLEC4F</i>   |      |            |      | ■    | ■    |      | ■    |      |          |          |          |      |      |
| 166012 | <i>CHST13</i>   |      | ■          |      |      |      |      |      |      | ■        |          |          | ■    |      |
| 170394 | <i>PWWP2</i>    |      |            | ■    |      |      |      |      |      | ■        |          |          | ■    |      |
| 201176 | <i>ARHGAP27</i> |      |            | ■    | ■    | ■    |      |      |      | ■        |          |          | ■    |      |
| 201255 | <i>LRRC45</i>   |      | ■          |      | ■    | ■    |      |      |      |          |          |          | ■    |      |
| 201294 | <i>UNC13D</i>   | ■    | ■          |      | ■    | ■    |      |      |      | ■        |          |          | ■    |      |
| 219855 | <i>SLC37A2</i>  |      | ■          | ■    | ■    | ■    |      |      |      |          |          |          | ■    |      |
| 219931 | <i>TPCN2</i>    |      | ■          |      |      |      |      |      |      |          |          |          |      |      |
| 220002 | <i>CYBASC3</i>  |      | ■          |      |      |      |      |      |      | ■        |          |          | ■    | ■    |
| 221002 | <i>RASGEF1A</i> | ■    | ■          |      | ■    | ■    |      |      |      |          |          |          |      |      |
| 221178 | <i>SPATA13</i>  |      |            |      | ■    | ■    |      |      |      |          |          |          |      |      |
| 221692 | <i>PHACTR1</i>  |      |            |      |      |      |      |      |      | ■        |          |          |      |      |
| 223082 | <i>ZNRF2</i>    |      |            |      | ■    | ■    |      |      |      | ■        |          |          |      |      |
| 253943 | <i>YTHDF3</i>   |      |            | ■    |      |      |      |      |      |          |          |          |      |      |
| 254359 | <i>ZDHHC24</i>  |      |            |      | ■    | ■    | ■    |      |      | ■        | ■        | ■        |      |      |
| 255231 | <i>MCOLN2</i>   | ■    | ■          |      |      |      |      |      |      | ■        | ■        | ■        |      |      |
| 255877 | <i>BCL6B</i>    | ■    | ■          | ■    | ■    | ■    | ■    | ■    |      | ■        | ■        | ■        | ■    |      |
| 257106 | <i>ARHGAP30</i> | ■    | ■          |      | ■    | ■    | ■    | ■    |      | ■        | ■        | ■        | ■    |      |
| 261734 | <i>NPHP4</i>    | ■    | ■          |      | ■    | ■    | ■    | ■    |      | ■        | ■        | ■        | ■    |      |
| 282991 | <i>BLOC1S2</i>  | ■    | ■          |      | ■    | ■    | ■    | ■    |      | ■        | ■        | ■        | ■    |      |
| 283234 | <i>CCDC88</i>   |      | ■          | ■    | ■    | ■    | ■    | ■    |      | ■        | ■        | ■        | ■    |      |
| 283991 | <i>FAM100B</i>  | ■    | ■          | ■    | ■    | ■    | ■    | ■    |      | ■        | ■        | ■        | ■    |      |
| 284013 | <i>VMO1</i>     | ■    | ■          | ■    | ■    | ■    | ■    | ■    |      |          |          | ■        | ■    |      |
| 284098 | <i>PIGW</i>     |      | ■          | ■    |      |      | ■    |      |      | ■        |          |          | ■    |      |
| 284996 | <i>RNF149</i>   |      | ■          | ■    |      |      | ■    |      |      | ■        |          |          | ■    |      |
| 286336 | <i>FAM78A</i>   |      | ■          | ■    | ■    | ■    |      |      |      | ■        | ■        |          | ■    |      |
| 333929 | <i>SNAI3</i>    |      |            |      |      |      |      |      |      | ■        |          |          |      |      |
| 340348 | <i>TSPAN33</i>  |      |            |      | ■    | ■    |      |      |      | ■        |          |          | ■    |      |
| 353514 | <i>LILRA5</i>   |      |            |      |      |      |      |      |      |          |          |          | ■    |      |
| 374403 | <i>TBC1D10C</i> | ■    | ■          | ■    | ■    | ■    | ■    | ■    | ■    | ■        | ■        | ■        | ■    |      |
| 374659 | <i>HDDC3</i>    | ■    | ■          | ■    | ■    | ■    | ■    | ■    | ■    | ■        | ■        | ■        | ■    |      |
| 375387 | <i>LRRC33</i>   |      |            |      |      |      |      |      |      | ■        | ■        | ■        | ■    |      |
| 375593 | <i>TRIM73</i>   |      | ■          |      |      |      |      |      |      |          |          |          | ■    |      |
| 387521 | <i>Kua</i>      |      | ■          |      |      |      |      |      |      |          |          |          | ■    |      |
| 388325 | <i>UNQ5783</i>  | ■    | ■          | ■    | ■    | ■    | ■    | ■    |      |          |          |          | ■    |      |

\*Transcription factor binding site

†Data compiled from Whole Genome rVISTA.<sup>1</sup> Color in a box denotes the presence of at least one TFBS in the 5 kb promoter region of the respective gene.

**Table S6. mRNA Expression of Transcription Factors Based on Microarray Analyses\***

| Transcription Factor | Gene Symbol  | GeneID | Expression |       | Fold Change | FDR P <sup>†</sup> | Detection Score <sup>‡</sup> |       |
|----------------------|--------------|--------|------------|-------|-------------|--------------------|------------------------------|-------|
|                      |              |        | Control    | AAA   |             |                    | Control                      | AAA   |
| PEA3                 | <i>ETV4</i>  | 2118   | 3.84       | 3.62  | -2.44       | NA <sup>§</sup>    | 0.367                        | 0.258 |
| ELF1                 | <i>ELF1</i>  | 1997   | 9.64       | 10.44 | 1.76        | 2.63e-02           | 1                            | 1     |
| ETS2                 | <i>ETS2</i>  | 2114   | 8.58       | 8.08  | 1.44        | NA                 | 1                            | 1     |
| ETS1                 | <i>ETS1</i>  | 2113   | 4.87       | 5.69  | 2.59        | NA                 | 0.956                        | 0.996 |
| NFKB p65             | <i>RELA</i>  | 5970   | 9.44       | 9.46  | 1.01        | NA                 | 1                            | 1     |
| NFKB p50             | <i>NFKB1</i> | 4790   | 10.29      | 10.83 | 1.46        | NA                 | 1                            | 1     |
| GABPA                | <i>GABPA</i> | 2551   | 7.51       | 6.98  | 1.51        | NA                 | 1                            | 1     |
| GABPB2               | <i>GABPB</i> | 2553   | 6.67       | 7.32  | 1.68        | NA                 | 0.999                        | 1     |
| TEL2                 | <i>ETV7</i>  | 51513  | 5.70       | 5.44  | 1.32        | NA                 | 0.993                        | 0.993 |
| AML1                 | <i>RUNX1</i> | 861    | 6.80       | 8.00  | 2.5         | 5.78e-03           | 0.999                        | 1     |
| NERF                 | <i>ELF2</i>  | 1998   | 8.69       | 8.18  | 1.45        | NA                 | 1                            | 1     |
| ISGF-3               | <i>STAT1</i> | 6772   | 8.63       | 10.08 | 2.80        | 3.38e-04           | 1                            | 1     |

\*Data based on Lenk et al. (2007) analysis.<sup>5</sup>

<sup>†</sup>FDR= False Discovery Rate. P-value for AAA compared to control after correction for multiple testing.

<sup>‡</sup>Based on Illumina platform in which a *Detection Score* ≥ 0.99 was used as the criteria for a gene to be considered expressed.

<sup>§</sup>Not applicable as the gene was not expressed or did not show significant differential expression between AAA and control.

**Table S7. Enriched Gene Ontology (GO) Categories for Genes with Increased Expression (N=1,222\*)**

| GO Term                                                                                   | GO ID   | GO Size | Expect. |       | Odds Ratio | P value  |
|-------------------------------------------------------------------------------------------|---------|---------|---------|-------|------------|----------|
|                                                                                           |         |         | Count   | Count |            |          |
| immune response                                                                           | 0006955 | 383     | 32.27   | 112   | 4.91       | 1.22e-33 |
| response to external stimulus                                                             | 0009605 | 718     | 63.13   | 122   | 2.26       | 3.56e-13 |
| inflammatory response                                                                     | 0006954 | 291     | 25.40   | 62    | 2.94       | 2.31e-11 |
| locomotory behavior                                                                       | 0007626 | 219     | 19.26   | 51    | 3.25       | 6.34e-11 |
| chemotaxis                                                                                | 0006935 | 121     | 10.55   | 34    | 4.19       | 4.43e-10 |
| response to bacterium                                                                     | 0009617 | 25      | 2.18    | 14    | 13.46      | 2.47e-09 |
| cellular defense response                                                                 | 0006968 | 56      | 4.92    | 21    | 6.32       | 3.76e-09 |
| cell death                                                                                | 0008219 | 871     | 76.25   | 126   | 1.86       | 6.16e-09 |
| cytokine production                                                                       | 0001816 | 146     | 12.84   | 36    | 3.47       | 8.34e-09 |
| response to biotic stimulus                                                               | 0009607 | 282     | 24.75   | 55    | 2.60       | 1.13e-08 |
| positive regulation of cell activation                                                    | 0050867 | 72      | 6.33    | 23    | 4.95       | 2.42e-08 |
| antigen processing and presentation of peptide or polysaccharide antigen via MHC class II | 0002504 | 18      | 1.58    | 11    | 16.45      | 4.13e-08 |
| multi-organism process                                                                    | 0051704 | 252     | 21.68   | 49    | 2.64       | 4.17e-08 |
| regulation of leukocyte activation                                                        | 0002694 | 75      | 6.54    | 23    | 4.70       | 4.94e-08 |
| positive regulation of lymphocyte activation                                              | 0051251 | 62      | 5.45    | 20    | 5.01       | 1.64e-07 |
| immune response-regulating signal transduction                                            | 0002764 | 29      | 2.55    | 13    | 8.52       | 3.12e-07 |
| immune response-activating cell surface receptor signaling pathway                        | 0002429 | 25      | 2.20    | 12    | 9.67       | 3.55e-07 |
| cell communication                                                                        | 0007154 | 3436    | 298.94  | 370   | 1.40       | 4.34e-07 |
| immune system development                                                                 | 0002520 | 252     | 22.16   | 47    | 2.44       | 5.44e-07 |
| leukocyte activation                                                                      | 0045321 | 99      | 8.47    | 25    | 3.67       | 5.80e-07 |
| myeloid leukocyte activation                                                              | 0002274 | 46      | 4.04    | 16    | 5.60       | 8.99e-07 |
| regulation of defense response                                                            | 0031347 | 83      | 7.30    | 22    | 3.80       | 1.79e-06 |
| protein kinase cascade                                                                    | 0007243 | 212     | 18.32   | 40    | 2.51       | 1.81e-06 |
| lymphocyte differentiation                                                                | 0030098 | 49      | 4.29    | 16    | 5.12       | 2.21e-06 |
| hemopoiesis                                                                               | 0030097 | 218     | 19.17   | 41    | 2.46       | 2.29e-06 |
| phosphate metabolic process                                                               | 0006796 | 910     | 80.01   | 120   | 1.64       | 2.85e-06 |
| locomotion                                                                                | 0040011 | 408     | 35.87   | 64    | 1.99       | 3.26e-06 |
| T cell activation                                                                         | 0042110 | 46      | 3.96    | 15    | 5.20       | 3.78e-06 |
| interspecies interaction between organisms                                                | 0044419 | 239     | 21.01   | 42    | 2.26       | 1.03e-05 |
| response to lipopolysaccharide                                                            | 0032496 | 19      | 1.67    | 9     | 9.40       | 1.25e-05 |
| regulated secretory pathway                                                               | 0045055 | 15      | 1.32    | 8     | 11.93      | 1.28e-05 |
| positive regulation of immune system process                                              | 0002684 | 56      | 4.84    | 16    | 4.28       | 1.30e-05 |
| defense response                                                                          | 0006952 | 78      | 6.45    | 19    | 3.62       | 1.40e-05 |
| regulation of response to stimulus                                                        | 0048583 | 137     | 11.88   | 28    | 2.75       | 1.45e-05 |
| regulation of cytokine biosynthetic process                                               | 0042035 | 56      | 4.91    | 16    | 4.21       | 1.58e-05 |
| cell chemotaxis                                                                           | 0060326 | 34      | 2.99    | 12    | 5.71       | 1.77e-05 |
| regulation of catalytic activity                                                          | 0050790 | 637     | 56.01   | 87    | 1.69       | 1.93e-05 |
| positive regulation of mononuclear cell proliferation                                     | 0032946 | 35      | 3.08    | 12    | 5.46       | 2.48e-05 |
| response to virus                                                                         | 0009615 | 77      | 6.74    | 19    | 3.46       | 2.53e-05 |
| membrane protein ectodomain proteolysis                                                   | 0006509 | 25      | 2.20    | 10    | 6.97       | 2.54e-05 |
| antigen processing and presentation                                                       | 0019882 | 31      | 2.69    | 11    | 5.82       | 3.38e-05 |
| activation of immune response                                                             | 0002253 | 66      | 5.80    | 17    | 3.64       | 3.94e-05 |

|                                                                                                                                                  |         |      |        |     |       |          |
|--------------------------------------------------------------------------------------------------------------------------------------------------|---------|------|--------|-----|-------|----------|
| regulation of apoptosis                                                                                                                          | 0042981 | 309  | 26.81  | 48  | 1.98  | 5.01e-05 |
| regulation of lymphocyte proliferation                                                                                                           | 0050670 | 49   | 4.31   | 14  | 4.19  | 5.46e-05 |
| regulation of adaptive immune response                                                                                                           | 0002819 | 38   | 3.34   | 12  | 4.83  | 6.29e-05 |
| positive regulation of cytokine secretion                                                                                                        | 0050715 | 18   | 1.58   | 8   | 8.35  | 6.83e-05 |
| positive regulation of immune response                                                                                                           | 0050778 | 14   | 1.22   | 7   | 10.58 | 7.25e-05 |
| regulation of JUN kinase activity                                                                                                                | 0043506 | 23   | 2.02   | 9   | 6.71  | 7.98e-05 |
| positive regulation of protein kinase activity                                                                                                   | 0045860 | 149  | 13.10  | 28  | 2.44  | 9.05e-05 |
| regulation of kinase activity                                                                                                                    | 0043549 | 247  | 21.72  | 40  | 2.04  | 0.00011  |
| positive regulation of T cell proliferation                                                                                                      | 0042102 | 29   | 2.55   | 10  | 5.50  | 0.00011  |
| regulation of T cell activation                                                                                                                  | 0050863 | 35   | 3.04   | 11  | 4.85  | 0.00012  |
| protein modification process                                                                                                                     | 0006464 | 1345 | 118.26 | 156 | 1.42  | 0.00013  |
| positive regulation of developmental process                                                                                                     | 0051094 | 432  | 37.98  | 61  | 1.75  | 0.00014  |
| lymphocyte activation during immune response                                                                                                     | 0002285 | 15   | 1.32   | 7   | 9.13  | 0.00014  |
| viral infectious cycle                                                                                                                           | 0019058 | 53   | 4.66   | 14  | 3.76  | 0.00014  |
| ARF protein signal transduction                                                                                                                  | 0032011 | 41   | 3.60   | 12  | 4.33  | 0.00014  |
| protein amino acid phosphorylation                                                                                                               | 0006468 | 567  | 49.35  | 75  | 1.64  | 0.00015  |
| lysosome organization                                                                                                                            | 0007040 | 20   | 1.76   | 8   | 6.96  | 0.00017  |
| leukocyte migration                                                                                                                              | 0050900 | 42   | 3.68   | 12  | 4.20  | 0.00018  |
| innate immune response                                                                                                                           | 0045087 | 118  | 10.34  | 23  | 2.55  | 0.00020  |
| positive regulation of transferase activity                                                                                                      | 0051347 | 156  | 13.72  | 28  | 2.30  | 0.00020  |
| leukocyte mediated immunity                                                                                                                      | 0002443 | 82   | 7.17   | 18  | 2.97  | 0.00020  |
| positive regulation of I-kappaB kinase/NF-kappaB cascade                                                                                         | 0043123 | 89   | 7.83   | 19  | 2.85  | 0.00022  |
| cytokine metabolic process                                                                                                                       | 0042107 | 62   | 5.43   | 15  | 3.36  | 0.00023  |
| adaptive immune response                                                                                                                         | 0002250 | 56   | 4.89   | 14  | 3.52  | 0.00024  |
| positive regulation of adaptive immune response based on somatic recombination of immune receptors built from immunoglobulin superfamily domains | 0002824 | 21   | 1.85   | 8   | 6.42  | 0.00025  |
| leukocyte adhesion                                                                                                                               | 0007159 | 21   | 1.85   | 8   | 6.42  | 0.00025  |
| T cell selection                                                                                                                                 | 0045058 | 5    | 0.44   | 4   | 41.78 | 0.00027  |
| chronic inflammatory response                                                                                                                    | 0002544 | 5    | 0.44   | 4   | 41.64 | 0.00028  |
| antigen processing and presentation of exogenous peptide antigen via MHC class II                                                                | 0019886 | 5    | 0.44   | 4   | 41.64 | 0.00028  |
| regulation of leukocyte degranulation                                                                                                            | 0043300 | 5    | 0.44   | 4   | 41.64 | 0.00028  |
| ceramide metabolic process                                                                                                                       | 0006672 | 32   | 2.81   | 10  | 4.75  | 0.00028  |
| stress-activated protein kinase signaling pathway                                                                                                | 0031098 | 63   | 5.54   | 15  | 3.27  | 0.00029  |
| I-kappaB kinase/NF-kappaB cascade                                                                                                                | 0007249 | 51   | 4.44   | 13  | 3.62  | 0.00032  |
| intracellular signaling cascade                                                                                                                  | 0007242 | 914  | 76.85  | 106 | 1.48  | 0.00033  |
| apoptosis                                                                                                                                        | 0006915 | 243  | 20.61  | 37  | 1.97  | 0.00034  |
| cell activation during immune response                                                                                                           | 0002263 | 17   | 1.49   | 7   | 7.30  | 0.00035  |
| antigen processing and presentation of peptide antigen via MHC class I                                                                           | 0002474 | 17   | 1.49   | 7   | 7.30  | 0.00035  |
| regulation of B cell activation                                                                                                                  | 0050864 | 33   | 2.90   | 10  | 4.54  | 0.00037  |
| regulation of immune effector process                                                                                                            | 0002697 | 34   | 2.97   | 10  | 4.38  | 0.00047  |
| positive regulation of calcium-mediated signaling                                                                                                | 0050850 | 9    | 0.79   | 5   | 13.02 | 0.00049  |
| cellular alkene metabolic process                                                                                                                | 0043449 | 23   | 2.02   | 8   | 5.57  | 0.00051  |
| positive regulation of mast cell degranulation                                                                                                   | 0043306 | 3    | 0.26   | 3   | Inf   | 0.00068  |
| regulation of ARF GTPase activity                                                                                                                | 0032312 | 24   | 2.11   | 8   | 5.22  | 0.00071  |
| negative regulation of programmed cell death                                                                                                     | 0043069 | 270  | 23.74  | 40  | 1.83  | 0.00072  |
| T cell receptor signaling pathway                                                                                                                | 0050852 | 14   | 1.23   | 6   | 7.82  | 0.00074  |
| regulation of inflammatory response to antigenic stimulus                                                                                        | 0002861 | 6    | 0.53   | 4   | 20.82 | 0.00077  |
| regulation of myeloid leukocyte mediated immunity                                                                                                | 0002886 | 6    | 0.53   | 4   | 20.82 | 0.00077  |
| antigen processing and presentation of exogenous antigen                                                                                         | 0019884 | 6    | 0.53   | 4   | 20.82 | 0.00077  |
| regulation of mast cell activation                                                                                                               | 0033003 | 6    | 0.53   | 4   | 20.82 | 0.00077  |
| positive regulation of exocytosis                                                                                                                | 0045921 | 6    | 0.53   | 4   | 20.82 | 0.00077  |
| lymphocyte chemotaxis                                                                                                                            | 0048247 | 6    | 0.53   | 4   | 20.82 | 0.00077  |
| activation of JUN kinase activity                                                                                                                | 0007257 | 19   | 1.67   | 7   | 6.08  | 0.00078  |
| leukotriene biosynthetic process                                                                                                                 | 0019370 | 19   | 1.67   | 7   | 6.08  | 0.00078  |
| phospholipid efflux                                                                                                                              | 0033700 | 10   | 0.88   | 5   | 10.42 | 0.00090  |
| T-helper 2 type immune response                                                                                                                  | 0042092 | 10   | 0.88   | 5   | 10.42 | 0.00090  |
| positive regulation of interleukin-1 beta secretion                                                                                              | 0050718 | 10   | 0.88   | 5   | 10.42 | 0.00090  |
| chemokine metabolic process                                                                                                                      | 0050755 | 10   | 0.88   | 5   | 10.42 | 0.00090  |
| apoptotic program                                                                                                                                | 0008632 | 100  | 8.79   | 19  | 2.46  | 0.00102  |
| regulation of lymphocyte mediated immunity                                                                                                       | 0002706 | 37   | 3.25   | 10  | 3.87  | 0.00102  |
| membrane invagination                                                                                                                            | 0010324 | 214  | 18.82  | 33  | 1.92  | 0.00103  |
| regulation of protein kinase cascade                                                                                                             | 0010627 | 165  | 14.51  | 27  | 2.05  | 0.00117  |
| regulation of small GTPase mediated signal transduction                                                                                          | 0051056 | 216  | 18.99  | 33  | 1.90  | 0.00121  |
| icosanoid metabolic process                                                                                                                      | 0006690 | 38   | 3.34   | 10  | 3.73  | 0.00128  |
| positive regulation of interleukin-2 biosynthetic process                                                                                        | 0045086 | 11   | 0.97   | 5   | 8.68  | 0.00153  |
| induction of apoptosis by extracellular signals                                                                                                  | 0008624 | 39   | 3.43   | 10  | 3.60  | 0.00158  |

|                                                                       |         |     |       |    |       |         |
|-----------------------------------------------------------------------|---------|-----|-------|----|-------|---------|
| response to ATP                                                       | 0033198 | 7   | 0.62  | 4  | 13.88 | 0.00167 |
| thymic T cell selection                                               | 0045061 | 7   | 0.62  | 4  | 13.88 | 0.00167 |
| positive regulation of chemokine biosynthetic process                 | 0045080 | 7   | 0.62  | 4  | 13.88 | 0.00167 |
| di-, tri-valent inorganic cation homeostasis                          | 0055066 | 169 | 14.86 | 27 | 2.00  | 0.00168 |
| neutrophil chemotaxis                                                 | 0030593 | 16  | 1.41  | 6  | 6.25  | 0.00169 |
| positive regulation of T cell differentiation                         | 0045582 | 16  | 1.41  | 6  | 6.25  | 0.00169 |
| negative regulation of inflammatory response                          | 0050728 | 16  | 1.41  | 6  | 6.25  | 0.00169 |
| glycolipid metabolic process                                          | 0006664 | 27  | 2.37  | 8  | 4.39  | 0.00169 |
| defense response to virus                                             | 0051607 | 27  | 2.37  | 8  | 4.39  | 0.00169 |
| sphingolipid metabolic process                                        | 0006665 | 60  | 5.28  | 13 | 2.89  | 0.00181 |
| elevation of cytosolic calcium ion concentration                      | 0007204 | 82  | 7.21  | 16 | 2.54  | 0.00185 |
| anti-apoptosis                                                        | 0006916 | 179 | 15.74 | 28 | 1.95  | 0.00192 |
| regulation of MAP kinase activity                                     | 0043405 | 83  | 7.25  | 16 | 2.52  | 0.00198 |
| cell cycle                                                            | 0007049 | 830 | 72.98 | 97 | 1.41  | 0.0020  |
| T cell proliferation                                                  | 0042098 | 22  | 1.92  | 7  | 4.90  | 0.0020  |
| regulation of interleukin-6 production                                | 0032675 | 22  | 1.93  | 7  | 4.87  | 0.0021  |
| calcium-mediated signaling                                            | 0019722 | 28  | 2.45  | 8  | 4.19  | 0.0021  |
| positive regulation of apoptosis                                      | 0043065 | 269 | 23.65 | 38 | 1.73  | 0.0023  |
| regulation of interleukin-1 secretion                                 | 0050704 | 12  | 1.06  | 5  | 7.44  | 0.0024  |
| mast cell degranulation                                               | 0043303 | 4   | 0.35  | 3  | 31.28 | 0.0025  |
| acute inflammatory response to antigenic stimulus                     | 0002438 | 4   | 0.35  | 3  | 31.20 | 0.0025  |
| regulation of hypersensitivity                                        | 0002883 | 4   | 0.35  | 3  | 31.20 | 0.0025  |
| smooth muscle adaptation                                              | 0014805 | 4   | 0.35  | 3  | 31.20 | 0.0025  |
| regulation of retroviral genome replication                           | 0045091 | 4   | 0.35  | 3  | 31.20 | 0.0025  |
| positive regulation of interleukin-6 biosynthetic process             | 0045410 | 4   | 0.35  | 3  | 31.20 | 0.0025  |
| regulation of defense response to virus by host                       | 0050691 | 4   | 0.35  | 3  | 31.20 | 0.0025  |
| cell cycle phase                                                      | 0022403 | 382 | 33.59 | 50 | 1.59  | 0.0028  |
| myeloid leukocyte mediated immunity                                   | 0002444 | 8   | 0.70  | 4  | 10.44 | 0.0031  |
| antigen processing and presentation of endogenous antigen             | 0019883 | 8   | 0.70  | 4  | 10.41 | 0.0031  |
| intracellular lipid transport                                         | 0032365 | 8   | 0.70  | 4  | 10.41 | 0.0031  |
| Cdc42 protein signal transduction                                     | 0032488 | 8   | 0.70  | 4  | 10.41 | 0.0031  |
| type I interferon biosynthetic process                                | 0045351 | 8   | 0.70  | 4  | 10.41 | 0.0031  |
| humoral immune response                                               | 0006959 | 71  | 6.24  | 14 | 2.57  | 0.0031  |
| alcohol biosynthetic process                                          | 0046165 | 36  | 3.17  | 9  | 3.48  | 0.0032  |
| induction of programmed cell death                                    | 0012502 | 212 | 18.64 | 31 | 1.80  | 0.0033  |
| superoxide metabolic process                                          | 0006801 | 18  | 1.58  | 6  | 5.21  | 0.0034  |
| negative regulation of intracellular transport                        | 0032387 | 18  | 1.58  | 6  | 5.21  | 0.0034  |
| cytolysis                                                             | 0019835 | 24  | 2.11  | 7  | 4.29  | 0.0036  |
| regulation of chemokine production                                    | 0032642 | 13  | 1.14  | 5  | 6.51  | 0.0037  |
| negative regulation of protein import into nucleus                    | 0042308 | 13  | 1.14  | 5  | 6.51  | 0.0037  |
| cellular calcium ion homeostasis                                      | 0006874 | 128 | 11.25 | 21 | 2.06  | 0.0038  |
| pyridine nucleotide metabolic process                                 | 0019362 | 31  | 2.73  | 8  | 3.63  | 0.0044  |
| leukocyte homeostasis                                                 | 0001776 | 25  | 2.20  | 7  | 4.05  | 0.0047  |
| positive regulation of secretion                                      | 0051047 | 52  | 4.56  | 11 | 2.81  | 0.0047  |
| activation of MAPK activity                                           | 0000187 | 45  | 3.94  | 10 | 3.00  | 0.0047  |
| negative regulation of response to stimulus                           | 0048585 | 38  | 3.34  | 9  | 3.24  | 0.0048  |
| cellular cation homeostasis                                           | 0030003 | 182 | 16.00 | 27 | 1.83  | 0.0049  |
| regulation of cell cycle process                                      | 0010564 | 67  | 5.89  | 13 | 2.51  | 0.005   |
| regulation of T cell differentiation                                  | 0045580 | 14  | 1.23  | 5  | 5.81  | 0.005   |
| germinal center formation                                             | 0002467 | 9   | 0.79  | 4  | 8.32  | 0.005   |
| positive regulation of B cell proliferation                           | 0030890 | 9   | 0.79  | 4  | 8.32  | 0.005   |
| amyloid precursor protein catabolic process                           | 0042987 | 9   | 0.79  | 4  | 8.32  | 0.005   |
| cellular extravasation                                                | 0045123 | 9   | 0.79  | 4  | 8.32  | 0.005   |
| vesicle-mediated transport                                            | 0016192 | 500 | 43.96 | 61 | 1.47  | 0.005   |
| metal ion homeostasis                                                 | 0055065 | 140 | 12.31 | 22 | 1.95  | 0.005   |
| release of cytochrome c from mitochondria                             | 0001836 | 14  | 1.23  | 5  | 5.78  | 0.005   |
| response to osmotic stress                                            | 0006970 | 14  | 1.23  | 5  | 5.78  | 0.005   |
| respiratory burst                                                     | 0045730 | 14  | 1.23  | 5  | 5.78  | 0.005   |
| negative regulation of leukocyte activation                           | 0002695 | 32  | 2.81  | 8  | 3.48  | 0.005   |
| regulation of protein secretion                                       | 0050708 | 39  | 3.43  | 9  | 3.13  | 0.006   |
| positive regulation of protein transport                              | 0051222 | 46  | 4.04  | 10 | 2.90  | 0.006   |
| tryptophan catabolic process                                          | 0006569 | 5   | 0.44  | 3  | 15.60 | 0.006   |
| cellular response to nutrient                                         | 0031670 | 5   | 0.44  | 3  | 15.60 | 0.006   |
| intracellular cholesterol transport                                   | 0032367 | 5   | 0.44  | 3  | 15.60 | 0.006   |
| granulocyte macrophage colony-stimulating factor biosynthetic process | 0042253 | 5   | 0.44  | 3  | 15.60 | 0.006   |
| indole derivative catabolic process                                   | 0042436 | 5   | 0.44  | 3  | 15.60 | 0.006   |
| negative regulation of viral genome replication                       | 0045071 | 5   | 0.44  | 3  | 15.60 | 0.006   |



|                                                          |         |      |        |     |       |       |
|----------------------------------------------------------|---------|------|--------|-----|-------|-------|
| regulation of interferon-alpha biosynthetic process      | 0045354 | 5    | 0.44   | 3   | 15.60 | 0.006 |
| sphingoid catabolic process                              | 0046521 | 5    | 0.44   | 3   | 15.60 | 0.006 |
| defense response to bacterium                            | 0042742 | 76   | 6.68   | 14  | 2.36  | 0.006 |
| glutathione metabolic process                            | 0006749 | 20   | 1.76   | 6   | 4.46  | 0.006 |
| B cell mediated immunity                                 | 0019724 | 61   | 5.36   | 12  | 2.56  | 0.006 |
| positive regulation of cell communication                | 0010647 | 221  | 19.43  | 31  | 1.71  | 0.006 |
| nucleobase, nucleoside and nucleotide metabolic process  | 0055086 | 332  | 29.19  | 43  | 1.57  | 0.006 |
| nuclear division                                         | 0000280 | 222  | 19.52  | 31  | 1.70  | 0.007 |
| positive regulation of immune effector process           | 0002699 | 27   | 2.37   | 7   | 3.65  | 0.007 |
| regulation of cytokine production during immune response | 0002718 | 15   | 1.32   | 5   | 5.21  | 0.007 |
| NAD metabolic process                                    | 0019674 | 15   | 1.32   | 5   | 5.21  | 0.007 |
| positive regulation of nitric oxide biosynthetic process | 0045429 | 15   | 1.32   | 5   | 5.21  | 0.007 |
| positive regulation of proteolysis                       | 0045862 | 15   | 1.32   | 5   | 5.21  | 0.007 |
| regulation of viral reproduction                         | 0050792 | 15   | 1.32   | 5   | 5.21  | 0.007 |
| regulation of cell proliferation                         | 0042127 | 567  | 49.85  | 67  | 1.41  | 0.007 |
| regulation of establishment of protein localization      | 0070201 | 78   | 6.86   | 14  | 2.29  | 0.008 |
| vitamin biosynthetic process                             | 0009110 | 21   | 1.85   | 6   | 4.17  | 0.008 |
| regulation of interleukin-2 production                   | 0032663 | 21   | 1.85   | 6   | 4.17  | 0.008 |
| regulation of tumor necrosis factor production           | 0032680 | 21   | 1.85   | 6   | 4.17  | 0.008 |
| regulation of multi-organism process                     | 0043900 | 21   | 1.85   | 6   | 4.17  | 0.008 |
| alpha-beta T cell differentiation                        | 0046632 | 21   | 1.85   | 6   | 4.17  | 0.008 |
| negative regulation of T cell activation                 | 0050868 | 21   | 1.85   | 6   | 4.17  | 0.008 |
| phagocytosis                                             | 0006909 | 48   | 4.22   | 10  | 2.75  | 0.008 |
| M phase of mitotic cell cycle                            | 0000087 | 225  | 19.78  | 31  | 1.68  | 0.008 |
| production of molecular mediator of immune response      | 0002440 | 41   | 3.60   | 9   | 2.93  | 0.008 |
| B cell differentiation                                   | 0030183 | 41   | 3.60   | 9   | 2.93  | 0.008 |
| regulation of acute inflammatory response                | 0002673 | 10   | 0.88   | 4   | 6.94  | 0.008 |
| positive regulation of JNK cascade                       | 0046330 | 10   | 0.88   | 4   | 6.94  | 0.008 |
| spindle organization                                     | 0007051 | 28   | 2.46   | 7   | 3.47  | 0.009 |
| membrane lipid catabolic process                         | 0046466 | 28   | 2.46   | 7   | 3.47  | 0.009 |
| purine ribonucleotide metabolic process                  | 0009150 | 121  | 10.64  | 19  | 1.95  | 0.009 |
| biological regulation                                    | 0065007 | 6657 | 585.31 | 623 | 1.16  | 0.010 |
| positive regulation of innate immune response            | 0045089 | 22   | 1.93   | 6   | 3.91  | 0.010 |
| positive regulation of mitosis                           | 0045840 | 22   | 1.93   | 6   | 3.91  | 0.010 |
| T cell mediated immunity                                 | 0002456 | 16   | 1.41   | 5   | 4.73  | 0.010 |

\*The entire set of upregulated genes was used to identify enriched GO biological process categories with a software package available using R and Bioconductor.<sup>3,4</sup> A total of 1,222 genes with GO annotations were included into the analysis. This represents 91.8% of the total number of 1,331 genes with increased expression in AAA tissue samples and analyzed with Whole Genome rVISTA. The remaining 8.2% did not have functional annotations as of June 6, 2009. The reference gene set was the 18,057 distinct genes represented on both Affymetrix and Illumina arrays based on our initial microarray studies.<sup>5</sup> Only GO categories with more than 2 genes and a nominal  $P < 0.01$  using the hypergeometric test for enrichment are listed here. Tables S8 and S9 contain the results of GO analyses carried out with upregulated target genes for each transcription factor separately.



|                                                                 |     |     |     |   |     |    |
|-----------------------------------------------------------------|-----|-----|-----|---|-----|----|
| Positive regulation of cellular process                         | 45  |     | 48  |   |     |    |
| Positive regulation of cellular process                         |     | 41  |     |   |     |    |
| Positive regulation of JAK-STAT cascade                         |     |     |     | 2 | 2   |    |
| Positive regulation of JNK activity                             |     |     |     | 4 |     |    |
| Positive regulation of physiological process                    | 43  |     |     |   |     |    |
| Positive regulation of tyrosine phosphorylation of STAT protein |     |     |     | 2 | 2   |    |
| Programmed cell death                                           |     |     | 44  |   |     |    |
| Protein amino acid dephosphorylation                            | 14  |     |     |   |     |    |
| Protein amino acid phosphorylation                              |     | 37  |     |   | 42  | 15 |
| Protein kinase cascade                                          | 27  | 26  | 31  |   | 29  | 12 |
| Protein modification                                            |     |     |     |   |     | 24 |
| Regulation of apoptosis                                         |     | 28  |     |   |     |    |
| Regulation of catalytic activity                                | 23  |     | 28  |   |     |    |
| Regulation of programmed cell death                             |     | 28  |     |   |     |    |
| Response to biotic stimulus                                     |     |     | 29  |   |     |    |
| Response to external stimulus                                   | 38  |     | 50  |   |     |    |
| Response to other organism                                      |     |     | 26  |   |     |    |
| Response to wounding                                            | 28  |     | 35  |   |     |    |
| Signal transduction                                             | 155 | 164 | 191 |   | 154 | 44 |
| Stress-activated protein kinase signaling pathway               |     |     |     | 6 |     | 43 |
| T-cell activation                                               | 9   |     | 10  |   |     |    |
| Taxis                                                           |     |     | 20  |   |     |    |

\*The target gene lists were used to identify enriched GO biological process categories using WebGestalt (Web-based Gene Set Analysis Toolkit; <http://bioinfo.vanderbilt.edu/webgestalt>).<sup>6,7</sup> The reference gene set was the 18,057 distinct genes represented on both Affymetrix and Illumina arrays based on our initial microarray studies.<sup>5</sup> PEA3 was excluded from the GO analysis since it was not expressed on mRNA nor protein level in aortic tissues. C-ETS 1-68 was excluded from GO analysis since no human protein binding to the TFBS has been identified. GO Biological Process categories with a nominal P<0.0001 using the hypergeometric test for enrichment are listed for all TFs except ISGF-3, for which the nominal P was <0.001. Cell entries indicate the number of target genes for each TF having the specific GO annotation. N, total number of target genes with the TFBS among the gene set upregulated in AAA; n, number of target genes for which the GO category was available.

†GO categories listed for ISGF-3 have significance of P<0.001

**Table S9. Functional Classification of Upregulated Target Genes for each Transcription Factor Using GO Biological Process Terms**

| <b>GO Biological Process Category*</b>                | <b>Number of Genes<sup>†</sup></b> | <b>P<sup>‡</sup></b> | <b>Annotation Level</b> |
|-------------------------------------------------------|------------------------------------|----------------------|-------------------------|
| <b>ELF1 (377/483)</b>                                 |                                    |                      |                         |
| Immune system process                                 | 74                                 | 2.14e-23             | 4                       |
| Immune response                                       | 60                                 | 2.83e-19             | 4                       |
| Physiological response to stimulus                    | 91                                 | 5.91e-15             | 3                       |
| Signal transduction                                   | 155                                | 5.43e-14             | 4                       |
| Cell communication                                    | 162                                | 1.07e-12             | 3                       |
| Positive regulation of biological process             | 54                                 | 3.78e-08             | 3                       |
| Intracellular signaling cascade                       | 71                                 | 4.75e-08             | 5                       |
| Positive regulation of cellular process               | 45                                 | 1.48e-07             | 4                       |
| Positive regulation of cellular physiological process | 40                                 | 2.42e-07             | 5                       |
| Positive regulation of physiological process          | 43                                 | 2.66e-07             | 4                       |
| Organismal physiological process                      | 98                                 | 2.85e-07             | 3                       |
| Response to external stimulus                         | 38                                 | 2.92e-07             | 3                       |
| Defense response                                      | 36                                 | 4.08e-07             | 3                       |
| Protein kinase cascade                                | 27                                 | 1.07e-06             | 6                       |
| Phosphate metabolism                                  | 52                                 | 1.18e-06             | 6                       |
| Phosphorus metabolism                                 | 52                                 | 1.18e-06             | 5                       |
| Physiological defense response                        | 31                                 | 1.99e-06             | 4                       |
| Response to wounding                                  | 28                                 | 6.62e-06             | 4                       |
| Physiological response to wounding                    | 27                                 | 1.07e-05             | 4                       |
| Lymphocyte activation                                 | 12                                 | 3.38e-05             | 6                       |
| T-cell activation                                     | 9                                  | 4.25e-05             | 7                       |
| Leukocyte activation                                  | 13                                 | 4.28e-05             | 5                       |
| Cell activation                                       | 14                                 | 4.46e-05             | 4                       |
| Cytokine production                                   | 9                                  | 5.00e-05             | 4                       |
| Regulation of catalytic activity                      | 23                                 | 5.96e-05             | 3                       |
| Cellular defense response                             | 10                                 | 6.55e-05             | 5                       |
| Protein amino acid dephosphorylation                  | 14                                 | 7.11e-05             | 8                       |
| Defense response to virus                             | 4                                  | 8.49e-05             | 5                       |
| <b>ETS2 (370/481)</b>                                 |                                    |                      |                         |
| Signal transduction                                   | 164                                | 2.02e-18             | 4                       |
| Cell communication                                    | 170                                | 1.61e-16             | 3                       |
| Intracellular signaling cascade                       | 73                                 | 3.94e-09             | 5                       |
| Phosphate metabolism                                  | 52                                 | 6.59e-07             | 6                       |
| Phosphorus metabolism                                 | 52                                 | 6.59e-07             | 5                       |
| Protein kinase cascade                                | 26                                 | 2.44e-06             | 6                       |
| Positive regulation of cellular process               | 41                                 | 3.70e-06             | 4                       |
| Positive regulation of cellular physiological process | 36                                 | 7.38e-06             | 5                       |
| Protein amino acid phosphorylation                    | 37                                 | 1.74e-05             | 8                       |
| Cell surface receptor linked signal transduction      | 64                                 | 1.74e-05             | 5                       |
| Immune system development                             | 13                                 | 1.82e-05             | 5                       |
| Regulation of apoptosis                               | 28                                 | 2.67e-05             | 6                       |
| Regulation of programmed cell death                   | 28                                 | 3.27e-05             | 5                       |
| Hemopoiesis                                           | 12                                 | 4.47e-05             | 7                       |
| Hemopoietic or lymphoid organ development             | 12                                 | 5.00e-05             | 6                       |
| <b>ETS1 (483/635)</b>                                 |                                    |                      |                         |
| Immune system process                                 | 94                                 | 2.10e-29             | 4                       |

| <b>GO Biological Process Category*</b>                          | <b>Number of Genes<sup>†</sup></b> | <b>P<sup>‡</sup></b> | <b>Annotation Level</b> |
|-----------------------------------------------------------------|------------------------------------|----------------------|-------------------------|
| Immune response                                                 | 77                                 | 1.06e-24             | 4                       |
| Physiological response to stimulus                              | 112                                | 8.08e-17             | 3                       |
| Signal transduction                                             | 191                                | 5.77e-15             | 4                       |
| Cell communication                                              | 198                                | 7.30e-13             | 3                       |
| Organismal physiological process                                | 128                                | 1.11e-09             | 3                       |
| Response to external stimulus                                   | 50                                 | 1.37e-09             | 3                       |
| Defense response                                                | 44                                 | 7.77e-08             | 3                       |
| Chemotaxis                                                      | 20                                 | 2.35e-07             | 4                       |
| Taxis                                                           | 20                                 | 2.35e-07             | 4                       |
| Locomotor behavior                                              | 20                                 | 4.65e-07             | 4                       |
| Intracellular signaling cascade                                 | 82                                 | 4.70e-07             | 5                       |
| Response to wounding                                            | 35                                 | 7.79e-07             | 4                       |
| Physiological response to wounding                              | 34                                 | 1.07e-06             | 4                       |
| Protein kinase cascade                                          | 31                                 | 1.74e-06             | 6                       |
| Response to other organism                                      | 26                                 | 1.77e-06             | 4                       |
| Physiological defense response                                  | 36                                 | 2.94e-06             | 4                       |
| Positive regulation of biological process                       | 58                                 | 4.81e-06             | 3                       |
| Response to biotic stimulus                                     | 29                                 | 5.11e-06             | 3                       |
| Antimicrobial humoral response (sensu Vertebrata)               | 14                                 | 6.26e-06             | 6                       |
| Antimicrobial humoral response                                  | 14                                 | 8.51e-06             | 5                       |
| Humoral immune response                                         | 19                                 | 8.91e-06             | 5                       |
| Positive regulation of cellular process                         | 48                                 | 1.14e-05             | 4                       |
| Inflammatory response                                           | 26                                 | 1.30e-05             | 4                       |
| Behavior                                                        | 23                                 | 1.45e-05             | 3                       |
| Immune system development                                       | 15                                 | 1.70e-05             | 5                       |
| Lymphocyte activation                                           | 14                                 | 2.01e-05             | 6                       |
| Regulation of catalytic activity                                | 28                                 | 2.34e-05             | 3                       |
| Hemopoiesis                                                     | 14                                 | 3.41e-05             | 7                       |
| Leukocyte activation                                            | 15                                 | 3.56e-05             | 5                       |
| Hemopoietic or lymphoid organ development                       | 14                                 | 3.87e-05             | 6                       |
| Cell activation                                                 | 16                                 | 4.92e-05             | 4                       |
| T-cell activation                                               | 10                                 | 5.08e-05             | 7                       |
| Cell death                                                      | 46                                 | 6.79e-05             | 4                       |
| Death                                                           | 46                                 | 6.79e-05             | 3                       |
| Apoptosis                                                       | 44                                 | 8.77e-05             | 6                       |
| Positive regulation of cellular physiological process           | 40                                 | 9.79e-05             | 5                       |
| Programmed cell death                                           | 44                                 | 9.93e-05             | 5                       |
| <b>GABP (179/224)</b>                                           |                                    |                      |                         |
| Immune response                                                 | 23                                 | 2.17e-06             | 4                       |
| Immune system process                                           | 26                                 | 2.94e-06             | 4                       |
| Activation of JNK activity                                      | 4                                  | 5.95e-05             | 8                       |
| Positive regulation of JNK activity                             | 4                                  | 5.95e-05             | 8                       |
| JNK cascade                                                     | 6                                  | 7.18e-05             | 7                       |
| Stress-activated protein kinase signaling pathway               | 6                                  | 8.17e-05             | 6                       |
| <b>TEL2 (33/39)</b>                                             |                                    |                      |                         |
| Immune system process                                           | 13                                 | 5.38e-09             | 4                       |
| Positive regulation of JAK-STAT cascade                         | 2                                  | 5.21e-05             | 6                       |
| Positive regulation of tyrosine phosphorylation of STAT protein | 2                                  | 5.21e-05             | 7                       |
| Immune response                                                 | 8                                  | 5.61e-05             | 4                       |

| <b>GO Biological Process Category*</b>                          | <b>Number of Genes<sup>†</sup></b> | <b>P<sup>‡</sup></b> | <b>Annotation Level</b> |
|-----------------------------------------------------------------|------------------------------------|----------------------|-------------------------|
| JAK-STAT cascade                                                | 3                                  | 9.43e-05             | 7                       |
| <b>NERF (25/34)</b>                                             |                                    |                      |                         |
| Hemopoiesis                                                     | 5                                  | 1.52e-06             | 7                       |
| Hemopoietic or lymphoid organ development                       | 5                                  | 1.61e-06             | 6                       |
| Immune system development                                       | 5                                  | 2.10e-06             | 5                       |
| Immune system process                                           | 9                                  | 3.14e-06             | 4                       |
| Positive regulation of JAK-STAT cascade                         | 2                                  | 2.96e-05             | 6                       |
| Positive regulation of tyrosine phosphorylation of STAT protein | 2                                  | 2.96e-05             | 7                       |
| Myeloid cell differentiation                                    | 3                                  | 7.64e-05             | 4                       |
| <b>NFKB (421/536)</b>                                           |                                    |                      |                         |
| Immune system process                                           | 65                                 | 4.17e-15             | 4                       |
| Immune response                                                 | 50                                 | 3.56e-11             | 4                       |
| Signal transduction                                             | 154                                | 2.45e-09             | 4                       |
| Cell communication                                              | 165                                | 3.57e-09             | 3                       |
| Phosphate metabolism                                            | 59                                 | 1.26e-07             | 6                       |
| Phosphorus metabolism                                           | 59                                 | 1.26e-07             | 5                       |
| Intracellular signaling cascade                                 | 74                                 | 4.42e-07             | 5                       |
| Protein kinase cascade                                          | 29                                 | 9.32e-07             | 6                       |
| Immune system development                                       | 15                                 | 3.26e-06             | 5                       |
| Physiological response to stimulus                              | 74                                 | 4.00e-06             | 3                       |
| Protein amino acid phosphorylation                              | 42                                 | 4.95e-06             | 8                       |
| Hemopoiesis                                                     | 14                                 | 7.30e-06             | 7                       |
| Hemopoietic or lymphoid organ development                       | 14                                 | 8.33e-06             | 6                       |
| Phosphorylation                                                 | 45                                 | 2.10e-05             | 7                       |
| <b>NFKB p65 (99/127)</b>                                        |                                    |                      |                         |
| Immune system process                                           | 21                                 | 4.26e-08             | 4                       |
| Immune response                                                 | 17                                 | 8.41e-07             | 4                       |
| Signal transduction                                             | 44                                 | 5.84e-06             | 4                       |
| Negative regulation of biological process                       | 20                                 | 1.66e-05             | 3                       |
| Negative regulation of apoptosis                                | 8                                  | 3.62e-05             | 7                       |
| Negative regulation of programmed cell death                    | 8                                  | 4.00e-05             | 6                       |
| Cell communication                                              | 44                                 | 7.60e-05             | 3                       |
| <b>NFKB p50 (89/116)</b>                                        |                                    |                      |                         |
| Signal transduction                                             | 43                                 | 4.68e-07             | 4                       |
| Immune system process                                           | 18                                 | 8.34e-07             | 4                       |
| Protein kinase cascade                                          | 12                                 | 2.31e-06             | 6                       |
| Cell communication                                              | 43                                 | 7.28e-06             | 3                       |
| Protein amino acid phosphorylation                              | 15                                 | 1.91e-05             | 8                       |
| Immune response                                                 | 14                                 | 2.22e-05             | 4                       |
| Behavior                                                        | 9                                  | 2.67e-05             | 3                       |
| Phosphate metabolism                                            | 18                                 | 3.09e-05             | 6                       |
| Phosphorus metabolism                                           | 18                                 | 3.09e-05             | 5                       |
| Protein modification                                            | 24                                 | 4.45e-05             | 7                       |
| Biopolymer modification                                         | 24                                 | 7.72e-05             | 6                       |
| <b>ISRE (37/43)</b>                                             |                                    |                      |                         |
| Immune system process                                           | 9                                  | 1.08e-04             | 4                       |

| GO Biological Process Category*    | Number of Genes <sup>†</sup> | P <sup>‡</sup> | Annotation Level |
|------------------------------------|------------------------------|----------------|------------------|
| Immune response                    | 7                            | 8.35e-04       | 5                |
| <b>AML1 (128/162)</b>              |                              |                |                  |
| Immune system process              | 26                           | 2.79e-09       | 4                |
| Immune response                    | 20                           | 4.47e-07       | 4                |
| Physiological response to stimulus | 29                           | 4.18e-05       | 3                |

\*Using Whole Genome rVISTA,<sup>1</sup> genes in the upregulated gene set were sub-categorized according to the overrepresented TFBSs they contain for ELF1, ETS2, ETS1, NFKB, NFKB p65, NFKB p50, GABP, TEL2, ISRE, AML1 and NERF. PEA3 was excluded from the GO analysis since it was not expressed on mRNA nor protein level in aortic tissues. C-ETS 1-68 was excluded from GO analysis since no human protein binding to the TFBS has been identified. These gene lists were then used to identify enriched GO biological process categories they have in common using WebGestalt (Web-based Gene Set Analysis Toolkit; <http://bioinfo.vanderbilt.edu/webgestalt>).<sup>6,7</sup> The reference gene set for each analysis was comprised of the 18,057 distinct genes represented on both Affymetrix and Illumina arrays based on our initial microarray studies.<sup>5</sup> The numbers in parentheses indicate for each TFBS the number of genes with information on their GO Biological Process and the total number of target genes among the significantly upregulated genes in AAA for the TF in question.

<sup>†</sup>The number of genes in the indicated GO category belonging to the target gene list of the TFBS in question.

<sup>‡</sup>GO Biological Process categories with a nominal P<0.0001 using the hypergeometric test are listed for all other TFBSs, except for ISRE for which the nominal P was <0.001.

## References

- Zamboni AC, Zhang L, Minovitsky S, Kanter JR, Prabhakar S, Salomonis N, Vranizan K, Dubchak I, Conklin BR, Insel PA. Gene expression patterns define key transcriptional events in cell-cycle regulation by cAMP and protein kinase A. *Proc Natl Acad Sci U S A*. 2005;102:8561-8566.
- Matys V, Fricke E, Geffers R, Gossling E, Haubrock M, Hehl R, Hornischer K, Karas D, Kel AE, Kel-Margoulis OV, Kloos DU, Land S, Lewicki-Potapov B, Michael H, Munch R, Reuter I, Rotert S, Saxel H, Scheer M, Thiele S, Wingender E. TRANSFAC: transcriptional regulation, from patterns to profiles. *Nucleic Acids Res*. 2003;31:374-378.
- Gentleman RC, Carey VJ, Bates DM, Bolstad B, Dettling M, Dudoit S, Ellis B, Gautier L, Ge Y, Gentry J, Hornik K, Hothorn T, Huber W, Iacus S, Irizarry R, Leisch F, Li C, Maechler M, Rossini AJ, Sawitzki G, Smith C, Smyth G, Tierney L, Yang JY, Zhang J. Bioconductor: open software development for computational biology and bioinformatics. *Genome Biol*. 2004;5:R80.
- R: A Language and Environment for Statistical Computing [computer program]. Version 2.9.0. Vienna, Austria; 2009.
- Lenk GM, Tromp G, Weinsheimer S, Gatalica Z, Berguer R, Kuivaniemi H. Whole genome expression profiling reveals a significant role for immune function in human abdominal aortic aneurysms. *BMC genomics*. 2007;8:237.
- Ashburner M, Ball CA, Blake JA, Botstein D, Butler H, Cherry JM, Davis AP, Dolinski K, Dwight SS, Eppig JT, Harris MA, Hill DP, Issel-Tarver L, Kasarskis A, Lewis S, Matese JC, Richardson JE, Ringwald M, Rubin GM, Sherlock G. Gene ontology: tool for the unification of biology. The Gene Ontology Consortium. *Nat Genet*. 2000;25:25-29.
- Zhang B, Kirov S, Snoddy J. WebGestalt: an integrated system for exploring gene sets in various biological contexts. *Nucleic Acids Res*. 2005;33:W741-748.
